# Supplementary material for: Easy-to-use nomogram to predict neonatal hyperbilirubinemia
Source: PeerJ. 2025 Sep 3;13:e20017. doi: 10.7717/peerj.20017 (PMC12422276; doi:10.7717/peerj.20017)
Supplement: Supplemental Information 9 [file peerj-13-20017-s009.xlsx]

## Sheet: raw date
END	Newborn gender	GA（w）	BW（g）	Maternal age	Hypertension in pregnancy	Gestational diabetes	Hypothyroidism in pregnancy	Mode of delivery	PROM≥18h OR maternal fever Maternal-infant blood type	Abruption of the placenta	Placenta praevia	Prolonged labour	Amniotic fluid situation	Umbilical cord abnormalities	Umbilical bloodPH＜7.2	Apgar scores≤7	Maternal-infant blood type Incompatibility AND Coomb’s test(+)	Cranial haematoma	Breast feeding	Probiotic supplementation	Weight loss >9% in 3 days
END	V1	V2	V3	V4	V5	V6	V14	V7	V8	V9	V10	V11	V12	V13	V15	V16	V17	V18	V19	V20	V21
1	2	41	3550	29	0	0	0	1	0	0	0	0	1	0	0	0	0	0	1	1	0
1	1	41	4140	33	1	0	0	1	0	0	0	0	1	0	0	0	0	0	1	1	0
1	1	40	3600	31	0	0	0	2	1	0	0	0	1	0	0	0	0	0	1	0	0
1	2	40	3280	33	0	0	0	1	0	0	0	1	2	0	0	0	0	0	1	1	0
1	2	40	4365	30	0	0	0	1	0	0	0	0	1	0	0	0	0	0	1	0	0
1	1	40	3150	32	0	1	0	1	1	0	0	0	1	0	0	0	0	0	1	0	0
1	2	40	4100	34	0	0	0	1	0	0	0	0	1	1	0	0	0	1	1	0	0
1	2	40	2200	35	0	1	1	2	0	0	1	0	1	0	0	0	0	0	1	1	0
1	2	40	3510	35	0	1	0	1	0	0	0	0	2	0	0	0	0	0	1	0	0
1	2	39	2840	38	1	0	0	1	0	0	0	0	1	0	0	0	0	0	1	0	0
1	1	39	3450	30	0	0	0	1	1	0	0	1	1	0	1	1	0	0	1	0	1
1	1	39	3660	31	0	1	0	2	0	0	0	0	1	0	0	0	0	0	1	0	0
1	1	39	3250	29	0	1	0	1	0	0	0	0	1	0	0	0	0	0	1	0	0
1	2	39	2970	32	0	0	0	1	0	0	0	0	1	0	0	0	0	0	1	1	0
1	2	39	3850	36	0	0	0	2	0	0	0	0	1	0	0	0	0	0	1	0	0
1	2	39	3390	33	0	1	0	1	0	0	0	0	1	0	0	1	1	0	0	0	0
1	2	39	3680	29	0	0	0	1	1	0	0	0	1	0	0	0	1	0	1	1	0
1	1	39	3400	33	0	0	0	1	0	0	0	0	1	0	0	0	0	0	1	1	0
1	2	39	3620	26	0	1	0	1	0	0	0	0	1	0	0	0	0	0	0	0	0
1	2	39	2950	32	0	1	0	1	0	0	0	0	1	0	0	0	0	0	1	0	0
1	2	39	3350	30	0	1	0	2	0	0	0	0	1	0	0	0	1	0	1	0	0
1	2	39	4055	31	0	1	0	1	0	0	0	0	1	0	1	1	1	0	0	1	0
1	2	39	2800	33	0	0	0	1	0	0	0	0	1	0	0	0	1	0	1	0	0
1	1	39	3450	35	0	1	0	2	0	0	0	0	1	0	0	0	0	0	1	0	0
1	1	39	3900	29	0	1	0	1	0	0	0	0	1	0	0	0	0	0	1	1	0
1	1	39	3420	30	0	1	0	2	1	0	0	0	1	0	0	0	0	0	1	0	0
1	2	39	3410	28	0	0	0	1	0	0	0	0	1	0	0	0	0	0	0	0	0
1	1	39	2910	28	0	0	0	1	0	0	0	0	1	0	0	0	0	0	0	1	0
1	1	39	3000	26	0	0	0	1	1	0	0	0	1	0	0	0	0	0	0	0	0
1	1	39	3000	28	0	1	0	2	1	0	0	0	1	0	0	0	1	0	0	1	0
1	2	39	4100	30	0	1	0	1	1	0	0	0	1	0	0	0	0	0	1	0	0
1	1	39	3040	31	0	0	0	1	0	0	0	0	1	0	0	0	0	0	1	0	0
1	1	39	3370	33	1	1	0	1	0	0	0	0	1	0	0	0	0	0	1	1	0
1	2	39	3075	33	0	1	0	1	0	0	0	0	1	0	0	0	1	0	1	0	0
1	2	39	3250	32	0	0	0	1	0	0	0	0	1	0	0	0	0	0	1	1	1
1	1	39	3660	26	1	0	0	1	0	0	0	0	1	0	0	0	0	0	1	0	0
1	2	39	2750	33	0	1	0	2	0	0	0	0	1	1	0	0	0	0	1	0	0
1	1	39	3450	29	0	0	0	1	1	0	0	0	1	0	0	0	0	0	1	0	0
1	2	39	3350	34	0	0	0	1	0	0	0	0	1	0	0	0	0	0	1	0	0
1	1	39	3480	41	0	0	0	1	0	0	0	0	1	0	0	0	0	0	1	1	0
1	2	39	3220	31	0	0	0	1	1	0	0	0	1	0	0	0	0	0	1	0	0
1	1	39	3015	32	0	0	0	2	0	0	0	0	1	0	0	0	1	0	1	0	0
1	1	39	3550	25	0	0	0	2	0	0	0	0	1	0	0	0	0	0	1	0	0
1	1	38	3100	30	0	1	0	1	0	0	0	0	1	0	0	0	0	0	1	0	0
1	2	38	3360	35	0	0	0	1	0	0	0	0	1	0	0	0	1	0	1	1	0
1	1	38	3385	28	0	1	0	2	0	0	0	0	1	0	0	0	1	0	1	0	0
1	1	38	3400	33	0	0	0	1	0	0	0	0	1	0	0	0	1	0	1	0	0
1	1	38	4410	39	0	0	0	2	0	0	0	0	1	0	0	0	1	0	1	0	0
1	1	38	3730	33	0	0	0	2	1	0	0	0	1	0	0	0	0	0	1	0	0
1	2	38	3390	34	0	0	0	1	0	0	0	0	1	0	0	0	0	0	1	0	0
1	1	38	3520	30	0	0	0	1	0	0	0	0	1	0	0	0	0	0	1	0	0
1	1	38	2910	26	1	0	0	1	0	0	0	0	1	0	0	0	1	0	1	0	0
1	1	38	3650	29	0	1	1	2	1	0	0	0	1	0	0	0	0	0	1	0	0
1	1	38	3460	40	0	1	0	2	0	0	0	0	1	0	0	0	1	0	1	0	0
1	1	38	3080	30	0	0	0	1	0	0	0	0	2	0	0	0	1	0	1	1	0
1	1	38	3560	28	0	0	0	2	0	0	0	0	1	0	0	0	1	0	1	0	0
1	2	38	3250	32	0	0	0	1	0	0	0	0	1	0	0	0	0	0	1	0	1
1	1	38	2460	32	1	0	0	1	0	0	0	0	1	0	0	0	0	0	1	0	0
1	2	38	3150	31	0	1	0	1	1	0	0	0	1	0	0	0	0	0	1	0	0
1	1	38	2740	32	1	0	0	2	0	0	0	0	1	0	0	0	0	0	1	0	0
1	1	38	3200	30	0	1	0	1	0	0	0	0	1	0	0	0	0	0	1	0	0
1	1	38	3330	31	0	0	0	1	1	0	0	0	1	0	0	0	0	0	1	1	0
1	2	38	3950	28	1	1	0	2	0	0	0	0	1	0	0	0	1	0	1	0	0
1	1	37	2970	26	0	0	0	1	1	0	0	0	1	0	0	0	0	0	1	0	0
1	1	37	3520	35	0	1	0	2	0	0	0	0	1	0	0	0	1	0	1	0	0
1	1	37	3450	29	0	1	0	2	0	0	0	0	1	0	0	0	0	0	1	1	0
1	1	37	3310	25	0	1	0	1	1	0	0	0	1	0	0	0	1	0	1	0	0
1	1	37	3310	32	0	1	0	1	1	0	0	0	1	0	0	0	0	0	1	1	0
1	2	37	3250	27	0	0	0	1	1	0	0	0	1	0	0	0	0	0	1	0	0
1	2	37	2420	28	1	1	0	2	0	0	0	0	1	0	0	0	0	0	1	0	0
1	2	37	2420	32	0	1	0	1	0	0	0	0	1	0	0	0	0	0	1	0	0
1	1	37	1945	30	0	1	0	1	0	0	0	0	1	0	0	0	0	0	1	0	0
1	2	37	2470	32	0	0	0	2	0	0	0	0	1	0	0	0	0	0	1	1	0
1	1	37	3320	34	0	1	0	1	1	0	0	0	1	0	0	0	0	0	1	0	0
1	1	37	3660	29	0	0	0	1	1	0	0	0	1	0	0	0	0	0	1	0	1
1	2	37	2165	32	0	1	0	2	0	0	0	0	1	0	0	0	0	0	1	0	0
1	2	37	2375	32	0	0	0	1	0	0	0	0	1	0	0	0	1	0	1	1	0
1	2	37	2265	28	0	0	0	2	0	0	0	0	1	0	0	0	0	0	1	0	0
1	2	37	2390	29	0	1	0	2	0	0	0	0	1	0	0	0	0	0	1	0	0
1	2	37	3850	42	1	0	0	2	0	0	0	0	1	0	0	0	0	0	1	0	0
1	2	37	3930	31	1	1	0	1	0	0	0	0	1	0	0	0	1	0	1	0	0
1	1	37	2900	36	0	0	0	1	0	0	0	0	1	0	0	0	0	0	1	0	0
1	2	37	2370	27	0	0	1	2	0	0	0	0	1	1	0	0	0	0	1	0	0
1	1	36	2550	32	0	0	0	1	0	0	0	0	1	0	0	0	0	0	1	1	0
1	1	36	3420	27	0	0	0	1	1	0	0	0	1	0	0	0	0	0	1	0	0
1	1	36	2180	29	0	0	0	2	0	0	0	0	1	0	0	0	0	0	1	0	0
1	1	36	2670	30	0	1	0	1	1	0	0	0	1	0	0	0	0	0	1	1	0
1	1	36	2900	31	0	0	0	2	0	0	0	0	1	0	0	0	0	0	1	0	0
1	2	36	2740	32	0	1	0	1	0	0	0	0	1	0	0	0	0	0	1	0	0
1	2	36	2880	30	0	0	0	2	0	0	0	0	1	0	0	0	0	0	1	1	0
1	1	36	2540	36	0	1	0	1	0	0	0	0	1	0	0	0	1	0	1	0	0
1	1	36	2700	33	0	1	0	1	0	0	0	0	1	0	0	0	0	0	1	0	0
1	1	36	2780	26	0	0	0	1	0	0	0	1	1	0	1	1	0	0	1	1	1
1	2	36	1140	30	0	0	0	2	0	0	0	0	1	0	0	0	0	0	1	0	0
1	1	36	2200	32	1	0	0	2	0	0	0	0	1	0	0	0	0	0	1	1	0
1	1	36	1800	34	1	1	0	1	0	0	0	0	1	0	0	0	0	0	1	1	0
1	2	36	2660	37	0	1	0	1	0	0	0	0	2	0	0	0	0	0	1	0	0
1	1	36	2470	28	0	1	0	1	0	0	0	0	1	0	0	0	0	0	1	1	0
1	1	36	3720	30	0	0	0	2	0	0	0	0	1	0	0	0	0	0	1	0	0
1	1	35	3050	28	0	0	0	1	1	0	0	0	1	0	0	0	0	0	1	0	0
1	1	35	1950	30	0	1	0	2	1	0	0	0	1	0	0	0	0	0	1	0	0
1	1	35	2535	34	0	1	0	1	1	0	0	0	1	0	0	0	0	0	1	0	0
1	2	35	2130	31	0	1	0	2	1	0	0	0	1	0	0	0	0	0	1	0	0
1	1	35	2200	52	1	1	0	2	0	0	0	0	1	0	0	0	0	0	1	1	0
1	2	35	2500	28	0	0	0	2	0	0	0	0	1	0	0	0	0	0	1	0	0
1	1	35	2455	37	0	0	0	2	0	0	0	0	1	0	0	0	0	0	1	0	0
1	2	35	2400	36	1	0	0	2	0	0	0	0	1	0	0	0	0	0	1	1	0
1	1	35	2300	34	0	0	0	1	1	0	0	0	1	0	0	0	0	0	1	0	0
1	2	35	2780	25	1	0	0	2	0	0	0	0	1	0	0	0	0	0	1	0	0
1	1	35	2020	25	1	0	0	2	0	0	0	0	1	0	0	0	0	0	1	0	0
1	1	35	2150	30	0	0	0	1	1	0	0	0	1	0	0	0	0	0	1	1	0
1	1	35	2450	37	0	0	0	2	0	0	0	0	1	0	0	0	0	0	1	0	0
1	2	35	2670	27	0	0	0	1	1	0	0	0	1	0	0	0	1	0	1	0	0
1	2	35	2050	33	1	0	0	2	0	0	0	0	1	0	0	0	0	0	1	1	0
1	2	35	2250	29	0	0	0	1	1	0	0	0	1	0	0	0	0	0	1	1	0
1	1	35	2150	30	1	0	1	2	0	0	0	0	1	0	0	0	0	0	1	0	0
1	2	35	2260	39	1	1	0	2	0	0	0	0	1	0	0	0	0	0	1	0	0
1	1	35	2500	33	0	1	0	1	1	0	0	0	1	0	0	0	0	0	1	0	0
1	2	35	2310	31	0	0	0	1	0	0	0	0	1	0	0	0	0	0	1	0	0
1	2	35	1940	31	0	0	0	1	0	0	0	0	1	0	0	0	0	0	1	1	1
1	2	35	2190	31	0	0	0	2	0	0	0	0	1	0	0	1	0	0	1	0	0
0	1	43	3200	36	0	0	0	1	0	0	0	0	1	0	0	0	0	0	1	0	0
0	2	41	3020	31	1	1	0	2	0	0	0	0	2	0	0	0	0	0	1	1	0
0	1	41	4150	34	0	0	0	1	0	0	0	0	2	0	0	0	1	0	1	1	0
0	2	41	4000	29	0	0	0	2	0	0	0	0	1	0	0	0	0	0	1	0	0
0	2	41	3800	32	0	1	1	1	0	0	0	0	1	0	0	0	0	0	1	1	0
0	2	41	3140	31	0	1	0	1	1	0	0	0	1	0	0	0	0	0	1	0	0
0	2	41	2980	36	0	0	0	2	0	0	0	0	1	0	0	0	0	0	1	1	0
0	2	41	3230	28	0	1	0	1	0	0	0	0	1	0	0	0	0	0	1	0	0
0	1	41	3630	29	0	1	0	1	0	0	0	0	1	0	0	0	0	0	1	1	0
0	1	41	3200	31	0	1	0	1	0	0	0	0	1	0	0	0	0	0	1	0	0
0	2	41	3560	27	0	0	0	1	0	0	0	0	1	0	0	0	0	0	1	1	0
1	1	41	4140	33	1	0	0	1	0	0	0	0	1	0	0	0	0	0	1	1	0
0	2	40	2920	30	0	0	0	1	0	0	0	0	2	0	0	0	0	0	1	1	0
0	2	40	3760	32	0	0	1	1	0	0	0	0	1	0	0	0	0	0	1	1	0
0	1	40	3880	31	0	1	0	2	0	0	0	0	1	0	0	0	0	0	1	0	0
0	2	40	3680	31	0	0	0	1	0	0	0	0	1	0	0	0	0	0	1	0	0
0	2	40	3770	31	0	0	0	1	0	0	0	0	1	0	0	0	0	0	1	0	0
0	2	40	3260	29	0	1	0	1	0	0	0	0	1	0	0	0	0	0	1	0	0
0	2	40	3150	30	0	1	0	1	0	0	0	0	1	0	0	0	0	0	1	1	0
0	2	40	3330	32	0	0	0	1	0	0	0	0	1	0	0	0	0	0	1	0	0
0	1	40	3500	31	0	1	0	2	0	0	0	0	1	0	0	0	1	0	1	0	0
0	2	40	3870	33	0	0	0	1	0	0	0	0	1	0	0	0	1	0	1	1	0
0	1	40	3930	30	0	1	0	2	0	0	0	0	1	0	0	0	0	0	1	1	0
0	1	40	3720	30	0	0	0	2	0	0	0	0	1	0	0	0	0	0	1	1	0
0	2	40	2870	26	1	0	0	2	0	0	0	0	1	0	0	0	1	0	1	1	0
0	2	40	3150	28	0	0	0	2	0	0	0	0	1	0	0	0	0	0	1	1	0
1	1	40	3600	31	0	0	0	1	1	0	0	0	1	0	0	0	0	0	1	1	0
0	2	40	3930	28	0	0	0	1	0	0	0	0	1	0	0	0	0	0	1	1	0
0	1	40	3970	30	0	0	0	1	0	0	0	0	1	0	0	0	0	0	1	1	0
0	1	40	3800	26	0	0	0	1	0	0	0	0	1	0	0	0	0	0	1	0	0
0	2	40	3890	30	0	1	0	1	0	0	0	0	1	0	0	0	0	0	1	1	0
1	1	40	4010	29	0	1	0	1	1	0	0	0	2	0	0	0	0	0	1	1	1
0	1	40	3650	35	0	0	0	1	0	0	0	0	1	0	0	0	0	0	1	0	0
0	2	40	3680	32	0	1	0	1	0	0	0	0	2	0	1	0	0	0	1	1	0
0	2	40	3580	26	0	0	0	1	0	0	0	0	2	0	0	0	0	0	1	0	0
0	2	40	2990	27	0	0	0	1	0	0	0	0	1	0	0	0	0	0	1	1	0
0	1	40	3100	30	0	0	0	1	0	0	0	0	1	0	0	0	0	0	1	1	0
0	1	40	3400	28	0	0	0	1	0	0	0	0	1	0	0	0	0	0	1	1	0
0	2	40	3560	27	0	0	0	1	0	0	0	0	2	0	0	0	0	0	1	1	0
0	2	40	3360	26	0	0	0	1	0	0	0	0	1	0	0	0	0	0	1	0	0
0	1	40	3750	29	0	1	0	2	0	0	0	0	1	0	0	0	0	0	1	1	0
0	2	40	3620	29	0	1	0	1	0	0	0	0	1	0	0	0	0	0	1	1	0
0	1	40	3480	32	0	0	0	1	1	0	0	0	1	0	0	0	0	0	1	1	0
0	1	40	2680	32	0	0	0	1	0	1	1	0	1	0	0	0	1	0	1	0	0
0	1	40	3640	26	0	1	0	1	0	0	0	0	1	0	0	0	0	0	1	1	0
0	2	40	3400	30	0	1	0	1	0	0	0	0	1	0	0	0	0	0	1	0	0
0	2	40	3270	32	0	0	0	1	0	0	0	0	2	0	0	0	0	0	1	1	0
0	1	40	3230	31	0	1	0	1	1	0	0	0	1	0	0	0	0	0	0	0	0
0	1	40	3770	28	0	0	0	1	0	0	0	0	2	0	0	0	0	0	1	0	0
0	2	40	3830	30	0	0	0	1	0	0	0	0	1	0	0	0	0	0	1	0	0
0	2	40	3300	28	0	1	0	1	0	0	0	0	1	0	0	0	0	0	1	0	0
0	2	40	3840	37	0	1	0	1	0	0	0	0	1	0	0	0	0	0	1	1	0
0	2	40	3760	21	0	0	0	1	0	0	0	1	2	0	1	1	0	0	0	0	0
0	2	40	3870	28	1	1	0	2	0	0	0	0	1	0	0	0	0	0	1	1	0
0	2	40	3640	32	0	0	1	1	0	0	0	0	1	0	0	0	0	0	1	1	0
0	2	40	4120	32	0	0	0	1	0	0	0	0	1	0	0	0	0	0	1	1	0
0	1	40	3190	29	0	1	0	2	0	0	0	0	1	0	0	0	0	0	1	0	0
0	2	40	3590	38	0	1	0	2	0	0	0	0	1	0	0	0	0	0	1	1	0
0	1	40	3740	26	0	0	0	1	0	0	0	0	1	0	0	0	0	0	1	1	0
0	2	40	3670	30	0	0	0	1	0	0	0	0	2	0	0	0	0	0	1	0	0
0	2	40	2930	29	0	1	0	1	0	0	0	0	2	0	0	0	0	0	1	1	0
0	2	40	3400	36	0	1	0	1	0	0	0	0	1	0	0	0	1	0	1	0	0
0	1	40	4070	25	0	1	0	1	0	0	0	0	2	0	0	0	0	0	1	1	0
0	2	40	3290	32	0	1	1	2	0	0	0	0	1	0	0	0	0	0	1	1	0
0	1	40	3620	30	0	0	0	1	0	0	0	0	1	0	0	0	0	0	1	1	0
0	2	40	3550	31	0	0	0	1	0	0	0	0	1	0	0	0	0	0	1	1	0
0	2	40	3350	28	0	1	0	1	0	0	0	0	1	0	0	0	0	0	1	1	0
0	1	40	3270	34	0	1	0	1	0	0	0	0	2	0	0	0	0	0	1	1	0
0	2	40	3175	29	0	1	0	2	0	0	0	0	1	0	0	0	0	0	1	1	0
0	2	40	3480	26	0	1	0	1	0	0	1	0	1	0	0	0	0	0	1	1	0
0	2	40	3730	27	0	1	0	1	0	0	0	0	1	0	0	0	0	0	1	1	0
0	1	40	3330	34	1	1	0	1	0	0	0	0	2	0	0	0	0	0	1	1	0
0	1	40	3465	35	0	0	0	2	0	0	0	0	1	0	0	0	0	0	1	1	0
0	1	40	3770	35	0	1	0	2	0	0	0	0	1	0	0	0	0	0	1	0	0
0	1	40	3630	30	0	0	0	1	0	0	0	0	1	0	0	0	0	0	1	0	0
0	2	40	3510	30	0	0	0	1	1	0	0	0	2	0	0	0	0	0	1	0	0
0	1	40	3150	30	0	1	0	1	0	0	0	0	1	0	0	0	0	0	1	0	0
0	1	40	3220	29	0	1	0	1	0	0	0	0	1	0	0	0	0	0	1	1	0
0	2	40	3450	27	0	0	0	1	1	0	0	0	1	0	0	0	1	0	1	0	0
0	1	40	3000	34	0	1	0	1	0	0	0	0	1	0	0	0	0	0	1	0	0
0	2	40	3250	26	0	1	0	1	0	0	0	0	1	0	0	0	0	0	1	1	0
1	1	40	3570	30	0	1	0	1	1	0	0	0	1	0	0	0	0	0	1	1	0
0	2	40	3670	24	0	1	0	1	1	0	0	0	1	0	0	0	0	0	1	1	0
0	1	40	3650	28	1	0	0	1	1	0	0	0	1	0	0	0	0	0	1	0	0
0	1	40	3050	28	0	0	0	1	0	0	0	0	1	0	0	0	0	0	1	1	0
0	2	40	3150	36	0	1	0	2	0	0	0	0	1	0	0	0	1	0	1	1	0
0	2	40	3830	30	0	1	0	1	0	0	0	0	1	0	0	0	1	0	1	1	0
0	2	40	3510	33	0	0	0	1	0	0	0	0	1	0	0	0	0	0	1	1	0
0	1	40	3350	30	0	1	0	2	0	0	0	0	1	0	0	0	0	0	1	0	0
0	1	40	3420	32	0	1	0	2	0	0	0	0	2	0	0	0	1	0	1	1	0
0	2	40	3430	31	0	0	0	2	0	0	0	0	2	0	0	0	0	0	1	0	0
0	1	40	2445	26	0	0	0	2	0	0	0	0	1	0	0	0	0	0	1	1	0
0	1	40	3350	30	0	1	1	2	0	0	0	0	1	0	0	0	0	0	1	1	0
0	1	40	3690	28	0	0	0	1	0	0	0	0	1	0	0	0	0	0	1	1	0
0	2	40	3380	31	0	1	0	1	0	0	0	0	2	0	0	0	0	0	1	1	0
0	1	40	3550	29	0	0	0	1	0	0	0	0	2	0	0	0	0	0	1	1	0
0	1	40	4010	27	0	1	0	1	0	0	0	0	2	0	0	0	0	0	1	1	0
0	1	40	3730	31	1	0	1	1	0	0	0	0	2	0	0	0	0	0	1	1	0
0	1	40	4050	20	1	0	0	1	0	0	0	0	1	0	0	0	0	0	1	1	0
0	1	40	3405	28	0	1	0	2	0	0	0	0	1	0	0	0	1	0	1	0	0
0	1	40	3720	33	0	1	0	1	0	0	0	0	1	0	0	0	0	0	1	1	0
0	2	40	3510	35	0	1	0	1	0	0	0	0	1	0	0	0	0	0	1	1	0
0	2	40	3530	32	0	1	0	1	0	0	0	0	1	0	0	0	0	0	1	0	0
0	2	40	3220	27	0	1	0	1	0	0	0	0	1	0	0	0	0	0	1	1	0
0	1	40	3540	32	0	0	0	1	0	0	0	0	1	0	0	0	0	0	1	1	0
0	2	40	3860	25	0	1	0	1	0	0	0	0	1	0	0	0	0	0	1	0	0
0	2	40	3260	33	0	1	0	1	0	0	0	0	1	0	0	0	0	0	1	1	0
0	1	40	3350	29	0	0	0	2	0	0	0	0	1	0	0	0	0	0	1	1	0
0	2	40	3260	33	0	1	0	1	0	0	0	0	1	0	0	0	0	0	1	1	0
0	1	40	3920	35	0	1	0	1	0	0	0	0	1	0	0	0	0	0	1	0	0
0	2	40	3280	28	0	1	0	1	0	0	0	0	1	0	0	0	0	0	1	1	0
0	1	40	3000	33	0	0	0	1	0	0	0	0	1	0	0	0	0	0	1	1	0
0	1	40	2790	30	0	0	0	1	0	0	0	0	2	0	0	0	0	0	1	0	0
0	1	40	4110	31	0	1	0	1	0	0	0	0	1	0	0	0	0	0	1	1	0
0	2	40	3390	27	0	0	0	1	0	0	0	0	1	0	0	0	0	0	1	1	0
0	1	40	3400	26	0	1	0	1	1	0	0	0	1	0	0	0	0	0	1	0	0
0	1	40	3180	31	0	1	0	1	1	0	0	0	1	0	0	0	0	0	1	1	0
0	1	40	3180	32	0	0	1	1	1	0	0	0	1	0	0	0	0	0	1	1	0
1	2	39	3680	29	0	0	0	1	1	0	0	0	2	0	0	0	1	0	1	0	0
0	1	39	3590	33	0	0	0	1	0	0	0	0	2	0	0	0	0	0	1	1	0
0	2	39	3160	35	0	0	0	1	1	0	0	0	1	0	0	0	0	0	1	1	0
0	2	39	3210	23	0	0	0	1	1	0	0	0	1	0	0	0	0	0	1	1	0
0	1	39	3760	35	0	1	0	1	0	0	0	0	1	0	0	0	0	0	1	0	0
0	1	39	3360	29	0	0	0	1	0	0	0	0	1	0	0	0	0	0	1	0	0
0	2	39	3600	31	0	0	0	1	0	0	0	0	1	0	0	0	0	0	1	1	0
1	2	39	3330	30	0	0	0	1	0	0	0	0	1	0	0	0	0	0	1	0	0
0	2	39	3450	30	0	0	0	1	0	0	0	0	1	0	0	0	0	0	1	1	0
0	1	39	3370	33	0	0	0	1	0	0	0	0	1	0	0	0	0	0	1	0	0
0	1	39	3400	30	0	1	0	2	0	0	0	0	1	0	0	0	0	0	1	1	0
0	2	39	3820	35	0	1	0	1	0	0	0	0	1	0	0	0	0	0	1	1	0
0	2	39	2720	33	0	1	0	1	0	0	0	0	1	0	0	0	0	0	1	1	0
0	2	39	3300	28	0	1	0	1	0	0	0	0	1	0	0	0	0	0	1	1	0
0	2	39	3320	30	0	0	0	1	0	0	0	0	1	0	0	0	0	0	1	1	0
0	1	39	3130	33	0	1	0	2	0	0	0	0	1	0	0	0	0	0	1	1	0
0	2	39	3490	32	0	1	0	2	0	0	0	0	1	0	0	0	0	0	1	1	0
0	2	39	2160	29	0	1	0	1	0	0	0	0	1	0	0	0	0	0	1	0	0
0	2	39	3500	29	0	1	0	1	0	0	0	0	1	0	0	0	0	0	1	1	0
0	2	39	3160	29	0	1	0	1	0	0	0	0	1	0	0	0	0	0	1	1	0
0	2	39	3440	29	0	0	0	2	0	0	0	0	1	0	0	0	0	0	1	1	0
0	1	39	3400	33	0	1	0	1	0	0	0	0	1	0	0	0	0	0	1	1	0
0	1	39	3740	37	0	0	0	1	0	0	0	0	1	0	0	0	0	0	1	0	0
0	1	39	4600	31	0	0	1	2	0	0	0	0	1	0	0	0	1	0	1	1	0
0	1	39	3400	33	0	1	0	1	0	0	0	0	1	0	0	0	0	0	1	0	0
1	1	39	3450	30	0	0	0	2	0	0	0	0	1	0	0	0	1	0	1	0	0
0	1	39	3400	31	0	1	0	1	0	0	0	0	2	0	0	0	0	0	1	0	0
0	1	39	3260	29	0	1	0	1	0	0	0	0	1	0	0	0	0	0	1	1	0
0	2	39	2750	32	0	0	0	1	1	0	0	0	1	0	0	0	0	0	1	0	0
0	1	39	3750	30	0	0	0	1	0	0	0	0	2	0	0	0	0	0	1	0	0
0	2	39	3230	32	0	1	0	1	1	0	0	0	1	0	0	0	0	0	0	0	0
0	1	39	3300	31	0	0	0	1	0	0	0	0	2	0	0	0	0	0	1	0	0
0	2	39	3130	31	0	1	0	1	0	0	0	0	1	0	0	0	0	0	1	1	0
0	2	39	3900	33	0	1	0	1	1	0	0	0	1	0	0	0	1	0	1	0	0
0	1	39	3215	28	0	0	0	2	0	0	0	0	1	0	0	0	0	0	1	1	0
0	2	39	3440	30	0	0	0	2	0	0	0	0	1	0	0	0	0	0	1	1	0
0	2	39	3410	33	0	0	0	1	0	0	0	0	1	0	0	0	0	0	1	1	0
0	1	39	4010	28	0	1	0	1	0	0	0	0	1	0	0	0	0	0	1	1	0
0	1	39	3470	29	0	0	0	1	0	0	0	0	2	0	0	0	0	0	1	1	0
0	2	39	3200	32	0	1	0	1	0	0	0	0	1	0	0	0	0	0	1	1	0
0	1	39	3450	30	0	1	0	1	0	0	0	0	1	0	0	0	0	0	1	0	0
0	2	39	2850	28	0	0	0	1	0	0	0	0	2	0	0	0	0	0	1	1	0
0	2	39	2970	34	0	1	0	1	0	0	0	0	1	0	0	0	0	0	1	1	0
0	1	39	3170	27	0	0	0	1	0	0	0	0	1	0	0	0	0	0	1	1	0
0	1	39	3430	31	0	0	0	1	0	0	0	0	1	0	0	0	0	0	1	0	0
0	1	39	4090	40	0	1	0	1	0	0	0	0	1	0	0	0	0	0	1	1	0
0	1	39	3700	34	0	1	0	1	0	0	0	0	1	0	0	0	0	0	1	1	0
0	2	39	3690	33	0	1	0	1	0	0	0	0	1	0	0	0	0	0	1	1	0
0	1	39	3740	29	0	1	0	1	0	0	0	0	1	0	0	0	0	0	1	1	0
0	2	39	3890	33	0	1	1	1	0	0	0	0	1	0	0	0	0	0	1	1	0
0	2	39	3770	32	0	0	0	1	0	0	0	0	1	0	0	0	0	0	1	1	0
0	1	39	3150	39	0	0	0	1	0	0	0	0	1	0	0	0	0	0	1	0	0
0	2	39	3410	28	0	0	0	1	0	0	0	0	1	0	0	0	0	0	1	1	0
1	2	39	3400	32	0	1	0	1	0	0	0	0	1	0	0	0	0	0	1	1	0
0	1	39	3075	29	0	0	0	2	0	0	0	0	1	0	0	0	0	0	1	1	0
0	2	39	3470	33	0	0	0	1	0	0	0	0	1	0	0	0	0	0	1	1	0
0	2	39	4495	32	1	1	0	2	0	0	0	0	1	0	0	0	0	0	1	1	0
0	2	39	2980	33	0	0	0	2	0	0	0	0	1	0	0	0	0	0	1	0	0
1	1	39	3500	34	0	1	0	2	0	0	0	0	1	0	0	0	0	0	1	0	0
0	2	39	3330	31	0	0	1	1	0	0	0	0	2	0	0	0	0	0	1	1	0
0	2	39	2985	30	0	1	0	2	0	0	0	0	1	0	0	0	0	0	1	1	0
1	2	39	3050	31	0	1	0	1	0	0	0	0	1	0	0	0	0	0	1	1	0
0	2	39	3210	33	0	0	0	1	1	0	0	0	1	0	0	0	0	0	1	0	0
0	2	39	3560	28	0	1	0	1	0	0	0	0	1	0	0	0	0	0	1	1	0
1	1	39	3100	25	0	1	0	1	1	0	0	0	1	0	0	0	0	0	1	1	0
0	2	39	3490	31	0	1	0	1	0	0	0	0	1	0	0	0	0	0	1	1	0
0	2	39	3120	28	0	1	0	1	0	0	0	0	1	0	0	0	0	0	0	0	0
0	2	39	3405	35	0	0	0	2	0	0	0	0	1	0	0	0	0	0	1	1	0
0	1	39	3410	34	0	1	0	1	0	0	0	0	1	0	0	0	0	0	1	0	0
0	2	39	3220	33	0	0	0	1	0	0	0	0	1	0	0	0	0	0	1	0	0
0	2	39	3400	35	0	1	0	1	0	0	0	0	1	0	0	0	0	0	1	1	0
0	1	39	3350	28	0	1	0	1	0	0	0	0	1	0	0	0	0	0	1	0	0
0	1	39	3180	26	0	0	0	1	0	0	0	0	1	0	0	0	0	0	1	1	0
0	2	39	3320	30	0	1	0	1	0	0	0	0	1	0	0	0	0	0	1	1	0
0	2	39	2950	28	0	1	0	1	0	0	0	0	1	0	0	0	0	0	1	0	0
0	2	39	2950	33	0	1	0	1	0	0	0	0	1	0	1	1	0	0	1	0	0
0	2	39	2950	32	0	1	0	1	0	0	0	0	1	0	0	0	0	0	1	0	0
0	1	39	3030	29	0	0	0	1	0	0	0	0	2	0	0	0	0	0	1	1	0
0	1	39	3240	26	0	1	0	1	0	0	0	0	1	0	0	0	0	0	1	0	0
0	2	39	2590	31	0	1	0	1	0	0	0	0	2	0	0	0	0	0	1	1	0
1	2	39	3180	32	0	1	0	2	0	0	0	0	2	0	0	0	1	0	1	0	0
0	1	39	3080	29	0	1	0	1	0	0	0	0	1	0	0	0	0	0	1	1	0
0	2	39	3000	29	0	1	0	1	0	0	0	0	1	0	0	0	0	0	1	1	0
0	1	39	2930	37	0	1	0	1	0	0	0	0	1	0	0	0	0	0	0	1	0
1	2	39	3080	29	0	1	0	2	0	0	0	0	1	0	0	0	1	0	1	0	0
0	2	39	2390	36	0	1	0	1	0	0	0	0	1	0	0	0	0	0	1	0	0
0	1	39	3600	36	0	0	0	1	0	0	0	0	2	0	0	0	0	0	1	1	0
0	1	39	3770	31	0	1	0	1	0	0	0	0	1	0	0	0	0	0	1	1	0
0	2	39	3080	28	0	0	0	1	0	0	0	0	2	0	0	0	0	0	1	0	0
1	1	39	4000	31	1	0	0	1	0	0	0	0	1	0	0	0	1	0	0	0	0
0	2	39	3330	29	0	1	0	1	0	0	0	0	1	0	0	0	0	0	1	1	0
0	2	39	3150	28	0	0	1	1	0	1	1	1	1	0	0	1	0	0	1	1	0
1	2	39	2800	33	1	0	0	1	1	0	0	0	1	0	0	0	1	0	1	0	0
0	1	39	3340	29	0	0	0	1	1	0	0	0	1	0	0	0	0	0	1	1	0
0	1	39	3640	30	0	0	0	1	1	0	0	0	1	0	0	0	0	0	1	0	0
0	1	39	3900	29	0	1	0	1	0	0	0	0	1	0	0	0	0	0	1	1	0
0	2	39	3760	33	0	1	0	1	0	0	0	0	1	0	0	0	0	0	0	0	0
0	2	39	3500	34	0	0	0	2	0	0	0	0	1	0	0	0	0	0	1	1	0
0	1	39	3170	32	0	1	0	1	0	0	0	0	1	0	0	0	0	0	1	1	0
0	2	39	3700	29	0	1	0	1	0	0	0	0	1	0	0	0	0	0	1	1	0
0	1	39	3050	27	0	0	0	1	0	1	1	0	1	0	0	0	0	0	1	1	0
0	1	39	3400	31	0	1	0	1	0	0	0	0	1	0	0	0	0	0	1	0	0
0	2	39	3190	28	0	0	0	1	0	0	0	0	1	0	0	0	0	0	1	1	0
0	2	39	3510	29	0	1	1	1	0	0	0	0	1	0	0	0	0	0	1	1	0
0	2	39	3470	32	0	1	0	1	0	0	0	0	1	0	0	0	0	0	1	0	0
0	1	39	3470	27	0	0	0	1	0	0	0	0	1	0	0	0	0	0	1	1	0
0	2	39	2890	27	0	0	0	1	0	0	0	0	2	0	0	0	0	0	1	1	0
0	2	39	2880	30	0	1	0	1	0	0	0	0	1	0	0	0	0	0	1	0	0
0	2	39	3260	35	0	1	0	2	0	0	0	0	1	0	0	0	0	0	1	1	0
0	2	39	3970	30	1	0	0	2	0	1	1	0	1	0	0	0	0	0	1	0	0
0	2	39	3110	30	0	1	0	1	0	0	0	0	1	0	0	0	0	0	1	1	0
0	1	39	2430	36	1	1	0	1	0	0	0	0	1	0	0	0	0	0	1	0	0
0	2	39	3420	28	0	0	0	1	0	0	0	0	1	0	0	0	0	0	1	0	0
0	1	39	3410	34	0	1	0	1	0	0	0	0	1	0	0	0	0	0	1	1	0
0	1	39	3710	25	0	1	0	1	0	0	0	0	1	0	0	0	0	0	1	1	0
0	2	39	3540	29	0	1	0	1	0	0	0	0	1	0	0	0	0	0	1	1	0
0	2	39	3180	40	0	0	1	2	0	0	0	0	1	0	0	0	0	0	1	0	0
0	2	39	2830	28	0	1	0	2	0	0	0	0	1	0	0	0	0	0	1	1	0
0	1	39	3100	28	0	0	0	1	0	0	0	0	2	0	0	0	0	0	1	0	0
0	1	39	3430	33	0	1	0	1	0	0	0	0	1	0	0	0	0	0	1	1	0
0	1	39	3410	39	0	1	0	1	0	0	0	0	2	0	0	0	0	0	1	0	0
0	1	39	3550	28	1	1	0	1	0	0	0	0	1	0	0	0	0	0	1	1	0
0	1	39	3000	27	0	0	0	1	1	0	0	0	1	0	0	0	0	0	1	0	0
0	2	39	2930	33	0	1	0	1	1	0	0	0	2	0	0	0	0	0	1	1	0
0	2	39	2930	33	0	1	0	1	1	0	0	0	2	0	0	0	0	0	1	0	0
0	2	39	3200	34	0	1	0	1	0	0	0	0	1	0	0	0	0	0	1	0	0
0	1	39	4160	30	0	1	0	1	0	0	0	0	1	0	0	0	0	0	1	0	0
0	2	39	3240	33	0	1	0	1	0	0	0	0	2	0	0	0	0	0	1	1	0
0	2	39	3420	33	0	0	0	1	0	0	0	0	1	0	0	0	0	0	1	1	0
0	2	39	3240	33	0	1	0	1	0	0	0	0	2	0	0	0	0	0	1	1	0
0	1	39	4130	33	0	1	0	1	0	0	0	0	1	0	0	0	0	0	1	1	0
0	1	39	3720	34	0	1	0	1	0	0	0	0	1	0	0	0	0	0	1	1	0
0	2	39	3390	24	0	1	0	1	0	0	0	1	1	0	1	1	0	0	1	1	0
0	2	39	3850	28	0	1	0	1	0	0	0	0	1	0	0	0	0	0	0	1	0
0	2	39	2920	31	0	0	0	1	0	0	0	0	2	0	0	0	0	0	1	1	0
0	1	39	3410	29	0	1	0	1	0	0	0	0	1	0	0	0	0	0	1	1	0
0	1	39	3605	32	0	1	0	2	0	0	0	0	1	0	0	0	0	0	1	0	0
0	1	39	4140	31	0	1	0	1	0	0	0	0	1	0	0	0	0	0	1	1	0
0	2	39	3220	32	0	1	0	2	0	0	0	0	1	0	0	0	0	0	1	1	0
0	1	39	3200	31	1	1	0	2	0	0	0	0	1	0	0	0	0	0	1	0	0
0	1	39	3200	29	0	1	0	1	0	0	0	0	1	0	0	0	0	0	1	0	0
0	2	39	3250	28	0	0	0	1	0	0	0	0	1	0	0	0	0	0	1	0	0
0	1	39	3640	33	0	1	0	1	0	0	0	0	1	0	0	0	0	0	1	1	0
0	2	39	3370	36	0	1	1	1	0	0	0	0	1	0	0	0	0	0	1	0	0
0	1	39	3510	30	0	1	0	1	0	0	0	0	1	0	0	0	0	0	1	1	0
0	2	39	3300	26	0	0	0	1	0	0	0	0	1	0	0	0	0	0	1	0	0
0	1	39	3280	25	0	1	0	1	0	0	0	0	1	0	0	0	0	1	1	1	0
0	2	39	3220	28	0	0	0	2	0	0	0	0	1	0	0	0	0	0	1	0	0
0	1	39	3450	30	0	1	0	2	0	0	0	0	1	0	0	0	0	0	1	1	0
0	1	39	3520	36	1	1	0	2	0	0	0	0	1	0	0	0	0	0	1	1	0
0	1	39	3420	30	0	1	0	2	0	0	0	0	1	0	0	0	0	0	1	1	0
0	1	39	3890	29	0	1	0	2	0	0	0	0	1	0	0	0	0	0	1	1	0
0	1	39	3940	29	0	0	0	1	0	0	0	0	1	0	0	0	0	0	1	1	0
0	2	39	3620	31	0	1	0	1	0	0	0	0	2	0	0	0	0	0	1	1	0
0	1	39	4470	34	0	1	0	2	0	0	0	0	1	0	0	0	1	0	1	0	0
0	2	39	3080	34	0	1	0	1	0	0	0	0	1	0	0	0	0	0	1	0	0
0	2	39	2870	33	0	1	0	1	0	0	0	0	2	0	0	0	0	0	1	1	0
0	1	39	3490	33	0	1	0	1	0	0	0	0	1	0	0	0	0	0	1	0	0
0	1	39	3800	30	0	1	0	2	0	0	0	0	1	0	0	0	0	0	1	0	0
0	1	39	3190	24	0	0	0	1	1	0	0	0	1	0	0	0	0	0	1	0	0
0	2	39	3150	34	0	0	0	1	1	0	0	0	1	0	0	0	0	0	1	1	0
0	1	39	3520	28	0	1	0	1	0	0	0	0	1	0	0	0	0	0	1	1	0
0	1	39	3630	34	0	0	0	2	1	0	0	0	1	0	0	0	0	0	1	1	0
0	2	39	3100	41	0	1	1	1	0	0	0	0	1	0	0	0	0	0	1	1	0
0	1	39	3220	33	0	1	0	1	0	0	0	0	1	0	0	0	0	0	1	0	0
0	2	39	3980	27	0	1	0	2	0	0	0	0	1	0	0	0	0	0	1	1	0
0	2	39	2990	28	0	0	0	2	0	0	0	0	1	0	0	0	0	0	1	1	0
0	1	39	2820	28	0	0	0	2	0	0	0	0	1	0	0	0	0	0	1	0	0
0	2	39	3430	21	0	0	0	1	0	0	0	0	1	0	0	0	0	0	1	1	0
0	1	39	3350	32	0	1	0	1	0	0	0	0	1	0	0	0	0	0	1	1	0
0	1	39	4110	34	0	1	0	1	0	0	0	0	1	0	0	0	0	0	1	1	0
0	1	39	3730	33	1	1	0	2	0	0	0	0	1	0	0	0	0	0	1	0	0
0	1	39	3830	27	0	0	0	1	0	0	0	0	1	0	0	0	0	0	0	0	0
1	2	39	3200	31	0	1	1	2	0	0	0	0	1	0	0	0	1	0	1	0	0
0	1	39	3220	27	0	0	0	1	0	0	0	0	1	0	0	0	1	0	1	0	0
0	1	39	2870	33	0	1	0	1	0	0	0	0	1	0	0	0	0	0	1	1	0
0	1	39	3060	40	0	1	0	1	0	0	0	0	1	0	0	0	0	0	1	1	0
0	1	39	3180	34	0	1	0	1	0	0	0	0	2	0	0	0	0	0	1	0	0
0	2	39	4105	35	0	1	0	2	0	0	0	0	1	0	0	0	0	0	1	0	0
0	1	39	3110	34	0	1	0	2	0	0	0	0	1	0	0	0	0	0	1	0	0
0	2	39	3005	37	1	0	0	2	0	0	0	0	1	0	0	0	0	0	1	1	0
0	1	39	3090	33	0	0	0	1	0	0	0	0	1	0	0	0	0	0	1	0	0
0	2	39	3340	27	0	0	0	2	0	0	0	0	1	0	0	0	0	0	1	1	0
0	1	39	3590	31	0	0	0	1	0	0	0	0	1	0	0	0	0	0	1	1	0
0	2	39	3250	34	0	1	0	1	0	0	0	0	2	0	0	0	0	0	1	1	0
0	1	39	3605	29	0	0	0	2	0	0	0	0	1	0	0	0	0	0	1	1	0
0	2	39	3120	32	0	1	0	1	0	0	0	0	1	0	0	0	0	0	1	1	0
0	2	39	3035	32	0	0	0	2	0	0	0	0	1	0	0	0	0	0	1	0	0
0	2	39	3035	32	0	0	0	2	0	0	0	0	1	0	0	0	0	0	1	1	0
0	2	39	3160	31	0	1	0	1	0	0	0	0	1	0	0	0	0	0	1	0	0
0	2	39	2780	33	0	1	0	1	0	0	0	0	1	0	0	0	0	0	1	0	0
0	1	39	3980	36	0	1	0	2	0	0	0	0	1	0	0	0	0	0	1	0	0
1	2	39	3220	31	0	0	0	1	1	0	0	0	1	0	0	0	0	0	1	1	0
0	2	39	3050	27	0	0	0	1	0	0	0	0	2	0	0	0	0	0	1	0	0
0	1	39	3420	23	0	0	0	1	0	0	0	0	1	0	0	0	0	0	0	0	0
0	1	39	3060	27	0	0	0	1	0	0	0	0	1	0	0	0	0	0	1	1	0
0	1	39	3220	28	0	0	0	2	0	0	0	0	1	0	0	0	0	0	1	1	0
1	1	39	3580	26	0	1	0	1	0	0	0	0	2	0	0	0	1	0	1	0	0
0	1	39	3390	38	0	1	1	1	0	0	0	0	1	0	0	0	0	0	1	1	0
0	2	39	2560	32	0	1	0	1	0	0	0	0	1	0	0	0	0	0	1	1	0
1	2	39	4050	33	0	1	0	1	0	0	0	0	2	0	0	0	0	0	1	0	0
0	1	39	3450	29	0	0	0	1	0	0	0	0	1	0	0	0	0	0	1	1	0
0	1	39	3240	37	0	0	0	1	0	0	0	0	1	0	0	0	0	0	1	1	0
0	1	39	3540	34	0	0	0	1	0	0	0	0	1	0	0	0	0	0	1	1	0
0	1	39	3890	30	1	1	0	2	0	0	0	0	1	0	0	0	0	0	1	1	0
0	1	39	3480	27	0	1	0	2	0	0	0	0	1	0	0	0	0	0	1	0	0
0	2	39	3350	34	0	0	0	1	0	0	0	0	1	0	0	0	1	0	1	0	0
0	1	39	3680	29	0	0	0	1	0	0	0	0	1	0	0	0	0	0	1	1	0
0	1	39	3310	31	0	0	0	1	1	0	0	0	1	0	0	0	0	0	1	0	0
0	1	38	3700	27	0	0	0	1	1	0	0	1	1	0	1	1	0	0	1	0	0
0	2	38	3370	29	0	0	0	1	1	0	0	0	1	0	0	0	0	0	1	1	0
0	2	38	3370	29	0	0	0	1	1	0	0	0	1	0	0	0	0	0	1	1	0
0	1	38	3380	32	0	0	0	1	1	0	0	0	1	0	0	0	0	0	1	1	0
0	1	38	2975	26	0	0	0	2	0	0	0	0	1	0	0	0	0	0	1	1	0
1	1	38	3310	23	0	1	0	1	1	0	0	0	1	0	0	0	1	0	1	0	0
0	1	38	3240	28	0	1	0	1	0	0	0	0	2	0	0	0	0	0	1	0	0
0	2	38	3165	32	0	0	0	2	0	0	0	0	1	0	0	0	0	0	1	1	0
0	1	38	3820	29	0	0	1	1	0	0	0	0	1	0	0	0	0	0	1	1	0
0	1	38	3550	34	0	0	0	1	0	0	0	0	1	0	0	0	0	0	1	1	0
0	2	38	2950	31	0	1	0	1	0	0	0	0	1	0	0	0	0	0	1	1	0
0	1	38	3450	33	0	1	0	2	0	0	0	0	1	0	0	0	0	0	1	0	0
0	1	38	4350	28	0	1	0	1	0	0	0	0	1	0	0	0	0	0	1	1	0
1	1	38	3560	34	0	1	0	2	0	0	0	0	1	0	0	0	1	0	1	0	0
0	1	38	2860	35	0	0	0	1	0	0	0	0	1	0	0	0	0	0	1	1	0
0	1	38	3320	32	0	1	0	1	0	0	0	0	1	0	0	0	0	0	1	0	0
0	2	38	2800	27	0	1	0	1	0	0	0	0	1	0	0	0	0	0	1	0	0
0	1	38	3000	28	0	1	0	1	0	0	0	0	1	0	0	0	0	0	1	1	0
0	2	38	3670	33	0	1	0	2	0	0	0	0	1	0	0	0	0	0	1	1	0
0	1	38	3100	30	0	1	0	1	0	0	0	0	1	0	0	0	1	0	1	0	0
0	1	38	4500	34	0	0	0	1	0	0	0	0	1	0	0	0	0	0	1	0	0
0	2	38	3000	34	0	1	0	1	1	0	0	0	2	0	0	0	0	0	1	0	0
0	1	38	2570	26	0	0	0	1	1	0	0	0	1	0	0	0	0	0	1	1	0
0	1	38	3730	34	0	0	0	1	0	0	0	0	2	0	0	0	0	0	1	1	0
0	1	38	3730	35	0	1	0	1	0	0	0	0	1	0	0	0	0	0	1	1	0
0	1	38	2920	31	0	1	0	1	0	0	0	0	2	0	0	0	0	0	1	0	0
0	2	38	2655	31	0	1	1	2	0	0	0	0	1	0	0	0	0	0	1	1	0
0	1	38	3560	32	1	0	1	1	0	0	0	0	1	0	0	0	0	0	1	1	0
0	2	38	3545	31	0	1	0	2	0	0	0	0	1	0	0	0	0	0	1	0	0
0	2	38	3130	29	0	1	0	1	0	0	0	0	1	0	0	0	0	0	1	1	0
0	1	38	3790	23	0	1	0	1	0	0	0	0	1	0	0	0	0	0	1	1	0
0	1	38	3850	35	0	1	0	2	0	0	0	0	1	0	0	0	0	0	1	0	0
0	2	38	3020	33	0	1	0	1	0	0	0	0	1	0	0	0	0	0	1	1	0
0	1	38	2540	31	1	1	0	2	0	0	0	0	1	0	0	0	0	0	1	0	0
0	1	38	3350	35	0	0	0	1	0	0	0	0	1	0	0	0	0	0	1	0	0
0	2	38	3200	36	0	0	0	2	0	0	0	0	1	0	0	0	0	0	1	1	0
0	2	38	3300	32	0	0	0	2	0	0	0	0	1	0	0	0	0	0	1	0	0
0	2	38	3390	34	0	0	0	1	0	0	0	0	1	0	0	0	0	0	1	1	0
0	1	38	3470	33	0	0	0	1	0	0	0	0	1	0	0	0	0	0	1	1	0
0	1	38	3330	33	0	0	0	2	0	0	0	0	1	0	0	0	0	0	1	1	0
0	1	38	3420	32	0	1	0	1	0	0	0	0	1	0	0	0	0	0	1	1	0
0	1	38	3320	32	0	0	0	1	1	0	0	0	1	0	0	0	0	0	1	1	0
0	1	38	3020	39	0	1	0	1	0	0	0	0	1	0	0	0	0	0	1	1	0
0	1	38	2310	29	0	1	0	1	0	0	0	0	1	0	0	0	0	0	1	1	0
0	2	38	3290	30	0	0	0	1	0	0	0	0	2	0	0	0	0	0	1	0	0
0	2	38	3170	30	0	0	0	1	0	0	0	0	1	0	0	0	0	0	1	1	0
0	1	38	3090	30	0	1	0	1	0	0	0	0	1	0	0	0	0	0	1	1	0
0	2	38	3540	25	0	1	0	1	0	0	0	0	1	0	0	0	0	0	1	0	0
0	1	38	3790	34	1	0	0	1	0	0	0	0	1	0	0	0	0	0	1	0	0
0	1	38	2820	28	0	1	0	1	0	0	0	0	1	0	0	0	0	0	1	0	0
0	2	38	3260	25	0	1	0	1	0	0	0	0	2	0	0	0	0	0	1	1	0
0	2	38	3000	30	0	1	0	1	0	0	0	0	1	0	0	0	0	0	1	0	0
0	1	38	3650	31	0	1	0	1	0	0	0	0	1	0	0	0	0	0	1	1	0
1	1	38	3100	31	0	1	0	1	0	0	0	1	1	0	0	0	0	0	1	0	0
0	1	38	3530	31	0	1	0	1	0	0	0	0	1	0	0	0	0	0	1	0	0
0	1	38	2670	39	0	0	0	1	0	0	0	0	1	0	0	0	0	0	1	1	0
1	1	38	2670	35	0	1	0	2	0	0	0	0	1	0	0	0	0	0	1	1	0
0	2	38	2900	32	0	0	0	1	0	0	0	0	2	0	0	0	0	0	1	0	0
0	2	38	3560	35	0	0	0	1	0	0	0	0	1	0	0	0	0	1	1	1	0
0	1	38	3610	26	1	0	0	1	0	0	0	0	2	0	0	0	0	0	1	1	0
0	1	38	2570	29	0	0	0	1	1	0	0	0	1	0	0	0	0	0	1	1	0
0	1	38	2430	33	0	0	0	1	1	0	0	0	1	0	0	0	0	0	1	1	0
0	2	38	3250	35	1	1	0	2	0	0	0	0	1	0	0	0	0	0	1	1	0
0	1	38	3270	34	0	1	0	1	0	0	0	0	2	0	0	0	0	0	1	1	0
0	1	38	3670	32	0	1	0	2	0	0	0	0	1	0	0	0	0	0	1	1	0
0	1	38	3200	33	0	1	0	1	0	0	0	0	1	0	0	0	0	0	1	1	0
0	2	38	2980	28	0	0	0	1	0	0	0	0	2	0	0	0	0	0	1	1	0
0	2	38	2880	27	0	0	0	1	0	0	0	0	1	0	0	0	0	0	1	1	0
0	2	38	3700	32	0	0	0	1	0	0	0	0	1	0	0	0	0	0	1	1	0
1	1	38	2910	26	1	0	0	2	0	0	0	0	2	0	0	0	1	0	1	0	0
0	2	38	3490	36	0	1	0	2	0	0	0	0	1	0	0	0	0	0	1	1	0
0	1	38	3350	26	0	1	0	2	0	0	0	0	1	0	0	0	0	0	1	0	0
0	1	38	4180	41	1	1	0	2	0	0	0	0	1	0	0	0	0	0	1	0	0
0	2	38	3320	30	1	1	0	2	0	0	0	0	1	0	0	0	0	0	1	0	0
0	2	38	3275	33	0	0	0	2	0	0	0	0	1	0	0	0	0	0	1	0	0
0	2	38	3400	24	0	0	0	1	1	0	0	0	1	0	0	0	0	0	1	1	0
0	1	38	3300	32	0	0	0	1	0	0	0	0	2	0	0	0	0	0	1	0	0
0	1	38	3240	30	0	1	0	1	0	0	0	0	1	0	0	0	0	0	1	0	0
0	2	38	3230	31	1	1	0	1	0	0	0	0	1	0	0	0	0	0	1	1	0
0	1	38	3570	29	0	1	0	1	0	0	0	0	1	1	0	0	0	0	1	0	0
0	2	38	3420	29	0	1	0	1	0	0	0	0	1	0	0	0	0	0	1	1	0
0	2	38	3740	31	0	1	0	1	0	0	0	0	1	0	0	0	0	0	1	0	0
0	1	38	3130	27	0	1	0	2	0	0	0	0	1	0	0	0	0	0	1	1	0
0	1	38	3110	20	0	0	0	1	0	0	0	0	1	0	0	0	0	0	1	1	0
0	1	38	2990	34	0	1	0	1	0	0	0	0	1	0	0	0	0	0	1	0	0
0	1	38	3380	35	0	1	0	1	0	0	0	0	1	0	0	0	0	0	1	1	0
0	1	38	3820	32	0	0	0	2	0	0	0	0	1	0	0	0	0	0	1	0	0
0	1	38	3240	30	0	1	0	1	0	0	0	0	1	0	0	0	0	0	1	1	0
0	1	38	3295	28	0	0	0	2	0	0	0	1	1	0	0	0	0	0	1	0	0
0	2	38	3280	29	0	1	0	1	0	0	0	0	1	0	0	0	0	0	1	1	0
0	2	38	2970	29	0	0	0	1	1	0	0	0	1	0	0	0	0	0	1	0	0
0	1	38	3370	34	0	0	0	1	1	0	0	0	1	0	0	0	0	0	1	0	0
0	1	38	2630	27	0	0	0	2	0	0	0	0	1	0	0	0	0	0	1	1	0
1	1	38	2760	32	1	1	0	1	0	0	0	0	1	0	0	0	0	0	1	0	0
0	1	38	3575	26	1	1	0	2	0	0	0	0	1	0	0	0	0	0	1	1	0
0	2	38	2880	33	0	1	0	1	0	0	0	0	2	0	0	0	0	0	1	1	0
0	1	38	2660	28	0	1	0	1	0	0	0	0	1	0	0	0	0	0	1	0	0
0	2	38	2770	30	0	0	0	1	0	0	0	0	1	0	0	0	0	0	1	1	0
0	1	38	3280	32	0	0	0	1	0	0	0	0	1	1	0	0	0	0	1	1	0
0	1	38	3885	27	0	1	0	2	0	0	0	0	1	0	0	0	0	0	1	0	0
0	1	38	4010	29	0	1	0	1	0	0	0	0	1	0	0	0	0	0	1	1	0
0	1	38	3150	32	0	0	0	2	0	0	0	0	1	0	0	0	0	0	1	1	0
1	1	38	3330	31	0	0	0	2	1	0	0	0	1	0	0	0	0	0	1	0	0
0	1	38	3560	34	0	1	0	1	0	0	0	0	1	0	0	0	0	0	1	0	0
0	2	38	4300	31	0	1	0	2	0	0	0	0	1	0	0	0	0	0	1	1	0
0	2	38	4300	31	0	1	0	2	0	0	0	0	1	0	0	0	0	0	1	1	0
0	2	38	3520	31	0	0	0	1	0	0	0	0	1	0	0	0	0	0	1	0	0
0	2	38	3210	30	0	1	0	1	0	0	0	0	1	0	0	0	0	0	1	1	0
0	1	38	3620	25	0	0	0	1	0	0	0	0	1	0	0	0	0	0	1	0	0
0	1	38	3840	37	0	1	0	2	0	0	0	0	1	0	0	0	0	0	1	1	0
0	1	38	2800	31	0	1	0	1	1	0	0	0	1	0	0	0	1	0	1	0	0
0	1	38	3080	34	0	0	0	1	1	0	0	0	1	0	0	0	0	0	1	0	0
0	1	37	2930	32	0	1	0	1	1	0	0	0	1	0	0	0	0	0	1	0	0
0	1	37	3280	28	0	0	0	1	1	0	0	0	1	0	0	0	0	0	1	1	0
0	1	37	2900	32	0	0	0	1	1	0	0	0	1	0	0	0	0	0	1	1	0
0	1	37	3390	30	0	1	0	1	0	0	0	0	1	1	0	0	0	0	1	1	0
0	1	37	3150	31	0	1	0	1	0	0	0	0	1	0	0	0	0	0	1	0	0
0	2	37	3595	33	1	0	0	2	0	0	0	0	1	0	0	0	0	1	1	1	0
0	2	37	2690	25	0	0	0	1	0	1	1	0	1	0	0	0	0	0	1	1	0
0	2	37	3100	26	0	0	0	1	0	0	0	0	1	0	0	0	0	0	1	0	0
0	1	37	3230	29	0	0	0	1	0	0	0	0	1	0	0	0	0	0	1	0	0
0	2	37	3060	34	0	1	0	1	0	0	0	0	1	0	0	0	0	0	1	0	1
1	1	37	3450	35	0	1	0	1	0	0	0	0	1	0	0	0	0	0	1	1	0
0	1	37	3780	32	1	1	0	1	0	0	0	0	1	0	0	0	0	0	1	1	0
0	2	37	3720	39	0	1	0	1	0	0	0	0	1	0	0	0	0	0	1	0	0
0	1	37	3350	35	0	1	0	2	0	0	0	0	1	0	0	0	0	0	1	1	0
0	1	37	3350	35	0	1	0	2	0	0	0	0	1	0	0	0	0	0	1	0	0
0	1	37	3340	28	1	1	0	2	0	0	0	0	1	0	0	0	0	0	1	1	0
0	2	37	3145	32	1	0	0	2	0	0	0	0	1	0	0	0	0	0	1	1	0
0	1	37	3370	30	0	0	0	1	0	0	0	0	1	0	0	0	0	0	1	1	0
0	1	37	2750	31	0	1	0	1	0	0	0	0	1	0	0	0	0	0	1	0	0
0	1	37	3160	30	0	0	0	1	0	0	0	1	1	0	0	0	0	0	1	1	0
0	1	37	2450	27	1	0	0	1	0	0	0	0	1	0	0	0	0	0	1	0	0
0	2	37	2850	34	0	0	0	1	0	0	0	0	1	0	0	0	0	0	1	0	0
0	1	37	3700	29	0	0	0	1	0	0	0	0	2	0	0	0	0	0	1	1	0
0	2	37	2480	24	1	0	0	2	0	0	0	0	1	0	0	0	0	0	1	1	0
0	1	37	2950	26	0	0	0	1	0	0	0	0	1	0	0	0	0	0	1	1	0
0	1	37	2940	38	1	1	0	2	0	0	0	0	1	0	0	0	0	0	1	1	0
0	1	37	3670	32	0	1	0	2	0	0	0	0	1	0	0	0	0	0	1	1	0
0	2	37	3250	30	0	1	0	2	0	0	0	0	1	0	0	0	0	0	1	1	0
0	1	37	2720	32	0	0	0	1	0	0	0	0	1	0	0	0	0	0	1	0	0
0	2	37	3040	27	0	1	0	1	0	0	0	0	1	1	0	0	0	0	1	1	0
0	2	37	3260	34	0	1	1	2	0	0	0	0	1	0	0	0	0	0	1	0	0
0	1	37	3580	29	0	0	0	1	0	0	0	0	1	0	0	0	0	0	1	1	0
0	1	37	2750	30	0	0	0	2	0	0	0	0	1	0	0	0	0	0	1	0	0
0	1	37	2730	40	0	1	0	2	0	0	0	0	1	0	0	0	0	0	1	1	0
0	2	37	2800	30	0	0	0	1	1	0	0	0	1	0	0	0	0	0	1	1	0
0	2	37	3870	37	0	1	0	1	0	0	0	0	1	0	0	0	0	0	1	1	0
0	1	37	3710	34	0	0	0	1	0	0	0	0	1	0	0	0	0	0	1	0	0
0	2	37	2770	35	0	0	0	1	0	0	0	0	1	0	0	0	0	0	1	1	0
0	1	37	3720	44	0	1	0	2	0	0	0	0	1	0	0	0	0	0	1	1	0
0	2	37	2470	32	0	0	0	2	0	0	0	0	1	0	0	0	0	0	1	1	0
0	1	37	3400	25	1	1	0	1	0	0	0	0	1	0	0	0	0	0	1	0	0
0	1	37	4455	21	1	1	0	2	0	0	0	0	1	0	0	0	0	0	1	0	0
0	1	37	3000	28	0	1	0	2	0	0	0	0	1	0	0	0	0	0	1	1	0
1	1	37	2595	34	1	0	0	2	0	0	0	0	1	0	0	0	1	0	1	0	0
0	1	37	3780	26	1	1	0	1	0	0	0	0	1	0	0	0	0	0	1	1	0
0	1	37	3320	34	0	1	0	1	0	0	0	0	1	0	0	0	0	0	1	0	0
0	1	37	2680	30	1	0	0	1	0	0	0	0	2	0	0	0	0	0	1	0	0
0	1	37	3060	35	1	1	0	1	0	0	0	0	1	0	0	0	0	0	1	1	0
0	1	37	3560	29	0	1	0	1	0	0	0	0	2	0	0	0	0	0	1	1	0
0	1	37	3350	26	1	1	0	2	0	0	0	0	1	0	0	0	0	0	1	0	0
0	1	37	2460	33	1	1	0	1	0	0	0	0	1	0	0	0	0	0	1	1	0
0	1	37	2490	32	0	1	1	2	0	0	0	0	1	0	0	0	0	0	1	1	0
0	2	37	2390	29	0	1	0	1	0	0	0	0	1	0	0	0	0	0	1	1	0
1	2	37	2770	35	1	1	0	1	0	0	0	0	1	0	0	0	0	0	1	0	0
0	2	37	4435	28	1	1	0	2	0	0	0	0	1	0	0	0	0	0	1	0	0
1	2	37	3000	30	0	0	0	1	0	0	0	0	1	0	0	0	0	0	1	1	0
0	1	37	3060	28	0	0	0	1	1	0	0	1	1	0	0	0	1	0	1	1	0
0	1	37	3060	28	0	0	0	1	0	0	0	0	1	0	0	0	1	0	1	0	0
0	1	36	3500	21	0	1	0	1	0	0	0	0	2	0	0	0	0	0	1	0	0
1	2	36	2350	29	0	0	0	1	0	0	0	0	1	0	0	0	0	0	1	0	0
0	2	36	2350	29	1	0	0	1	0	0	0	0	1	0	0	0	0	0	1	1	0
0	1	36	2965	31	0	0	0	2	0	0	0	0	1	0	0	0	0	0	1	0	0
0	2	36	3050	41	1	1	0	1	0	0	0	0	1	0	1	1	0	0	1	1	0
0	2	36	2490	31	1	0	0	2	0	0	0	0	1	0	0	0	0	0	1	0	0
0	1	36	3055	34	0	0	0	2	0	1	1	0	1	1	0	0	0	0	1	1	0
1	1	36	2420	32	0	0	0	2	0	0	0	0	1	0	0	0	0	0	1	1	0
0	2	36	3040	40	0	1	0	2	0	1	1	0	1	0	0	0	0	0	1	0	0
0	2	36	2350	30	1	1	0	1	0	0	0	0	1	0	0	0	0	0	1	0	0
0	2	36	2380	30	0	0	0	1	0	0	0	0	1	0	0	0	0	0	1	1	1
0	1	36	2500	34	1	0	0	1	0	0	0	0	1	0	0	0	0	0	1	0	0
1	2	36	2200	35	0	1	0	1	1	0	0	0	1	0	0	0	0	0	1	0	0
0	2	36	2230	34	1	0	0	2	0	0	0	1	1	0	0	0	0	0	1	0	0
1	1	36	2605	31	1	0	1	2	0	0	0	0	1	1	0	0	0	1	1	0	0
1	2	36	4025	33	0	1	0	2	0	0	0	0	1	0	0	0	0	0	1	0	0
1	1	36	2670	30	0	1	0	1	1	0	0	0	1	0	0	0	0	0	1	0	0
1	1	36	3720	30	1	1	0	2	0	0	0	0	1	0	0	0	0	0	1	1	0
0	1	35	3050	28	0	0	0	1	0	0	0	0	1	0	0	0	1	0	1	1	0
0	2	35	2870	42	0	0	0	1	0	0	0	0	1	0	0	0	0	0	1	0	0
0	2	35	2050	34	0	0	0	2	0	1	1	0	1	0	0	0	0	0	1	0	0
1	2	35	2250	29	0	0	0	1	0	0	0	0	1	0	0	0	0	0	1	0	1
0	1	35	2150	30	1	1	0	2	0	0	0	0	1	0	0	0	0	0	1	1	0
1	1	35	2520	28	0	1	0	1	0	0	0	0	1	0	0	0	0	0	1	0	0
1	2	35	2080	27	1	0	0	2	0	0	0	0	1	0	0	0	0	0	1	0	0
1	1	35	4305	39	1	1	0	1	0	0	0	0	1	0	0	0	0	0	1	1	0
1	2	35	4010	45	0	1	0	2	1	0	0	0	1	0	0	0	0	0	1	0	0
1	1	35	2150	30	0	0	0	1	1	0	0	0	1	0	0	0	0	0	1	0	0
