# Supplementary material for: Easy-to-use nomogram to predict neonatal hyperbilirubinemia
Source: PeerJ. 2025 Sep 3;13:e20017. doi: 10.7717/peerj.20017 (PMC12422276; doi:10.7717/peerj.20017)
Supplement: Supplemental Information 10 [file peerj-13-20017-s010.xlsx]

## Sheet: Total data
END	GA	BW	Hypertension in pregnancy	Gestational diabetes	Hypothyroidism in pregnancy	PROM≥18h OR maternal fever Maternal-infant blood type	Amniotic fluid situation	Maternal-infant blood type Incompatibility AND Coomb’s test(+)	Probiotic supplementation	Weight loss >9% in 3 days	GA_num	BW_num	test
END	V2	V3	V5	V6	V7	V8	V12	V17	V20	V21	V2	V3
1	2	2	0	0	1	0	1	0	1	0	41	3550	1
1	2	2	1	0	1	0	1	0	1	0	41	4140	1
1	2	2	0	0	1	0	2	0	1	0	40	3280	1
1	2	2	0	0	1	0	1	0	0	0	40	4365	1
1	2	2	0	1	1	1	1	0	0	0	40	3150	1
1	2	1	0	1	2	0	1	0	1	0	40	2200	1
1	2	2	1	0	1	0	1	0	0	0	39	2840	1
1	2	2	0	0	1	1	1	0	0	1	39	3450	1
1	2	2	0	1	2	0	1	0	0	0	39	3660	1
1	2	2	0	0	2	0	1	0	0	0	39	3850	1
1	2	2	0	1	1	0	1	1	0	0	39	3390	1
1	2	2	0	0	1	0	1	0	1	0	39	3400	1
1	2	2	0	1	1	0	1	0	0	0	39	3620	1
1	2	2	0	1	1	0	1	0	0	0	39	2950	1
1	2	2	0	1	2	0	1	1	0	0	39	3350	1
1	2	2	0	1	1	0	1	1	1	0	39	4055	1
1	2	2	0	0	1	0	1	1	0	0	39	2800	1
1	2	2	0	1	1	0	1	0	1	0	39	3900	1
1	2	2	0	0	1	0	1	0	0	0	39	3410	1
1	2	2	0	0	1	0	1	0	1	0	39	2910	1
1	2	2	0	0	1	1	1	0	0	0	39	3000	1
1	2	2	0	1	2	1	1	1	1	0	39	3000	1
1	2	2	0	1	1	1	1	0	0	0	39	4100	1
1	2	2	0	0	1	0	1	0	0	0	39	3040	1
1	2	2	1	1	1	0	1	0	1	0	39	3370	1
1	2	2	0	1	1	0	1	1	0	0	39	3075	1
1	2	2	0	0	1	0	1	0	1	1	39	3250	1
1	2	2	1	0	1	0	1	0	0	0	39	3660	1
1	2	2	0	1	2	0	1	0	0	0	39	2750	1
1	2	2	0	0	1	0	1	0	0	0	39	3350	1
1	2	2	0	0	1	1	1	0	0	0	39	3220	1
1	2	2	0	0	1	0	1	1	1	0	38	3360	1
1	2	2	0	1	2	0	1	1	0	0	38	3385	1
1	2	2	0	0	1	0	1	1	0	0	38	3400	1
1	2	2	0	0	2	0	1	1	0	0	38	4410	1
1	2	2	0	0	1	0	1	0	0	0	38	3390	1
1	2	2	0	1	2	0	1	1	0	0	38	3460	1
1	2	2	0	0	1	0	2	1	1	0	38	3080	1
1	2	2	0	0	2	0	1	1	0	0	38	3560	1
1	2	2	0	0	1	0	1	0	0	1	38	3250	1
1	2	1	1	0	1	0	1	0	0	0	38	2460	1
1	2	2	0	1	1	1	1	0	0	0	38	3150	1
1	2	2	1	0	2	0	1	0	0	0	38	2740	1
1	2	2	0	1	1	0	1	0	0	0	38	3200	1
1	2	2	0	0	1	1	1	0	1	0	38	3330	1
1	2	2	1	1	2	0	1	1	0	0	38	3950	1
1	1	2	0	1	2	0	1	0	1	0	37	3450	1
1	1	2	0	1	1	1	1	1	0	0	37	3310	1
1	1	2	0	1	1	1	1	0	1	0	37	3310	1
1	1	2	0	0	1	1	1	0	0	0	37	3250	1
1	1	1	1	1	2	0	1	0	0	0	37	2420	1
1	1	1	0	1	1	0	1	0	0	0	37	2420	1
1	1	1	0	1	1	0	1	0	0	0	37	1945	1
1	1	1	0	0	2	0	1	0	1	0	37	2470	1
1	1	2	0	1	1	1	1	0	0	0	37	3320	1
1	1	1	0	1	2	0	1	0	0	0	37	2165	1
1	1	1	0	0	1	0	1	1	1	0	37	2375	1
1	1	1	0	0	2	0	1	0	0	0	37	2265	1
1	1	2	1	0	2	0	1	0	0	0	37	3850	1
1	1	2	1	1	1	0	1	1	0	0	37	3930	1
1	1	2	0	0	1	1	1	0	0	0	36	3420	1
1	1	2	0	1	1	1	1	0	1	0	36	2670	1
1	1	2	0	0	2	0	1	0	0	0	36	2900	1
1	1	2	0	1	1	0	1	0	0	0	36	2740	1
1	1	2	0	0	2	0	1	0	1	0	36	2880	1
1	1	2	0	1	1	0	1	0	0	0	36	2700	1
1	1	2	0	0	1	0	1	0	1	1	36	2780	1
1	1	1	0	0	2	0	1	0	0	0	36	1140	1
1	1	1	1	1	1	0	1	0	1	0	36	1800	1
1	1	1	0	1	1	0	1	0	1	0	36	2470	1
1	1	2	0	0	2	0	1	0	0	0	36	3720	1
1	1	2	0	0	1	1	1	0	0	0	35	3050	1
1	1	1	0	1	2	1	1	0	0	0	35	1950	1
1	1	2	0	1	1	1	1	0	0	0	35	2535	1
1	1	1	1	1	2	0	1	0	1	0	35	2200	1
1	1	1	1	0	2	0	1	0	1	0	35	2400	1
1	1	1	0	0	1	1	1	0	0	0	35	2300	1
1	1	2	1	0	2	0	1	0	0	0	35	2780	1
1	1	1	1	0	2	0	1	0	0	0	35	2020	1
1	1	1	0	0	1	1	1	0	1	0	35	2150	1
1	1	2	0	0	1	1	1	1	0	0	35	2670	1
1	1	1	1	0	2	0	1	0	1	0	35	2050	1
1	1	1	0	0	1	1	1	0	1	0	35	2250	1
1	1	1	1	0	2	0	1	0	0	0	35	2150	1
1	1	2	0	1	1	1	1	0	0	0	35	2500	1
1	1	1	0	0	1	0	1	0	0	0	35	2310	1
1	1	1	0	0	1	0	1	0	1	1	35	1940	1
1	1	1	0	0	2	0	1	0	0	0	35	2190	1
0	2	2	1	1	2	0	2	0	1	0	41	3020	1
0	2	2	0	0	2	0	1	0	0	0	41	4000	1
0	2	2	0	0	2	0	1	0	1	0	41	2980	1
0	2	2	0	1	1	0	1	0	0	0	41	3230	1
0	2	2	0	1	1	0	1	0	1	0	41	3630	1
0	2	2	0	1	1	0	1	0	0	0	41	3200	1
0	2	2	0	0	1	0	1	0	1	0	41	3560	1
1	2	2	1	0	1	0	1	0	1	0	41	4140	1
0	2	2	0	0	1	0	1	0	1	0	40	3760	1
0	2	2	0	1	2	0	1	0	0	0	40	3880	1
0	2	2	0	0	1	0	1	0	0	0	40	3770	1
0	2	2	0	1	1	0	1	0	0	0	40	3260	1
0	2	2	0	1	1	0	1	0	1	0	40	3150	1
0	2	2	0	0	1	0	1	0	0	0	40	3330	1
0	2	2	0	1	2	0	1	0	1	0	40	3930	1
0	2	2	0	0	2	0	1	0	1	0	40	3720	1
0	2	2	1	0	2	0	1	1	1	0	40	2870	1
0	2	2	0	0	2	0	1	0	1	0	40	3150	1
0	2	2	0	0	1	0	1	0	1	0	40	3930	1
0	2	2	0	0	1	0	1	0	1	0	40	3970	1
0	2	2	0	0	1	0	1	0	0	0	40	3800	1
0	2	2	0	1	1	0	1	0	1	0	40	3890	1
1	2	2	0	1	1	1	2	0	1	1	40	4010	1
0	2	2	0	0	1	0	1	0	0	0	40	3650	1
0	2	2	0	1	1	0	2	0	1	0	40	3680	1
0	2	2	0	0	1	0	2	0	0	0	40	3580	1
0	2	2	0	0	1	0	1	0	1	0	40	2990	1
0	2	2	0	0	1	0	1	0	1	0	40	3100	1
0	2	2	0	1	1	0	1	0	1	0	40	3620	1
0	2	2	0	0	1	1	1	0	1	0	40	3480	1
0	2	2	0	0	1	0	1	1	0	0	40	2680	1
0	2	2	0	0	1	0	2	0	1	0	40	3270	1
0	2	2	0	1	1	1	1	0	0	0	40	3230	1
0	2	2	0	0	1	0	1	0	0	0	40	3830	1
0	2	2	0	1	1	0	1	0	1	0	40	3840	1
0	2	2	1	1	2	0	1	0	1	0	40	3870	1
0	2	2	0	0	1	0	1	0	1	0	40	3640	1
0	2	2	0	0	1	0	1	0	1	0	40	4120	1
0	2	2	0	1	2	0	1	0	0	0	40	3190	1
0	2	2	0	1	2	0	1	0	1	0	40	3590	1
0	2	2	0	0	1	0	1	0	1	0	40	3740	1
0	2	2	0	0	1	0	2	0	0	0	40	3670	1
0	2	2	0	1	1	0	2	0	1	0	40	2930	1
0	2	2	0	1	2	0	1	0	1	0	40	3290	1
0	2	2	0	0	1	0	1	0	1	0	40	3620	1
0	2	2	0	0	1	0	1	0	1	0	40	3550	1
0	2	2	0	1	1	0	2	0	1	0	40	3270	1
0	2	2	0	1	2	0	1	0	1	0	40	3175	1
0	2	2	0	1	1	0	1	0	1	0	40	3730	1
0	2	2	1	1	1	0	2	0	1	0	40	3330	1
0	2	2	0	0	2	0	1	0	1	0	40	3465	1
0	2	2	0	1	2	0	1	0	0	0	40	3770	1
0	2	2	0	0	1	0	1	0	0	0	40	3630	1
0	2	2	0	1	1	0	1	0	0	0	40	3150	1
0	2	2	0	0	1	1	1	1	0	0	40	3450	1
0	2	2	0	1	1	0	1	0	0	0	40	3000	1
0	2	2	0	1	1	0	1	0	1	0	40	3250	1
1	2	2	0	1	1	1	1	0	1	0	40	3570	1
0	2	2	0	1	1	1	1	0	1	0	40	3670	1
0	2	2	1	0	1	1	1	0	0	0	40	3650	1
0	2	2	0	0	1	0	1	0	1	0	40	3050	1
0	2	2	0	1	2	0	1	1	1	0	40	3150	1
0	2	2	0	1	1	0	1	1	1	0	40	3830	1
0	2	2	0	0	1	0	1	0	1	0	40	3510	1
0	2	2	0	0	2	0	2	0	0	0	40	3430	1
0	2	1	0	0	2	0	1	0	1	0	40	2445	1
0	2	2	0	0	1	0	1	0	1	0	40	3690	1
0	2	2	0	1	1	0	2	0	1	0	40	3380	1
0	2	2	0	0	1	0	2	0	1	0	40	3550	1
0	2	2	0	1	1	0	2	0	1	0	40	4010	1
0	2	2	1	0	1	0	2	0	1	0	40	3730	1
0	2	2	1	0	1	0	1	0	1	0	40	4050	1
0	2	2	0	1	1	0	1	0	1	0	40	3720	1
0	2	2	0	1	1	0	1	0	1	0	40	3510	1
0	2	2	0	1	1	0	1	0	1	0	40	3220	1
0	2	2	0	0	1	0	1	0	1	0	40	3540	1
0	2	2	0	1	1	0	1	0	0	0	40	3860	1
0	2	2	0	1	1	0	1	0	1	0	40	3260	1
0	2	2	0	0	1	0	1	0	1	0	40	3000	1
0	2	2	0	0	1	0	2	0	0	0	40	2790	1
0	2	2	0	1	1	0	1	0	1	0	40	4110	1
0	2	2	0	0	1	1	1	0	1	0	40	3180	1
1	2	2	0	0	1	1	2	1	0	0	39	3680	1
0	2	2	0	0	1	1	1	0	1	0	39	3160	1
0	2	2	0	0	1	1	1	0	1	0	39	3210	1
0	2	2	0	1	1	0	1	0	0	0	39	3760	1
0	2	2	0	0	1	0	1	0	0	0	39	3360	1
1	2	2	0	0	1	0	1	0	0	0	39	3330	1
0	2	2	0	0	1	0	1	0	1	0	39	3450	1
0	2	2	0	0	1	0	1	0	0	0	39	3370	1
0	2	2	0	1	2	0	1	0	1	0	39	3400	1
0	2	2	0	1	1	0	1	0	1	0	39	3300	1
0	2	2	0	0	1	0	1	0	1	0	39	3320	1
0	2	2	0	1	2	0	1	0	1	0	39	3130	1
0	2	1	0	1	1	0	1	0	0	0	39	2160	1
0	2	2	0	1	1	0	1	0	1	0	39	3160	1
0	2	2	0	0	2	0	1	0	1	0	39	3440	1
0	2	2	0	1	1	0	1	0	1	0	39	3400	1
0	2	2	0	0	1	0	1	0	0	0	39	3740	1
0	2	2	0	0	2	0	1	1	1	0	39	4600	1
0	2	2	0	1	1	0	1	0	0	0	39	3400	1
1	2	2	0	0	2	0	1	1	0	0	39	3450	1
0	2	2	0	1	1	0	2	0	0	0	39	3400	1
0	2	2	0	0	1	1	1	0	0	0	39	2750	1
0	2	2	0	0	1	0	2	0	0	0	39	3750	1
0	2	2	0	1	1	1	1	0	0	0	39	3230	1
0	2	2	0	1	1	0	1	0	1	0	39	3130	1
0	2	2	0	1	1	1	1	1	0	0	39	3900	1
0	2	2	0	0	2	0	1	0	1	0	39	3440	1
0	2	2	0	0	1	0	1	0	1	0	39	3410	1
0	2	2	0	1	1	0	1	0	1	0	39	4010	1
0	2	2	0	1	1	0	1	0	1	0	39	3200	1
0	2	2	0	1	1	0	1	0	0	0	39	3450	1
0	2	2	0	1	1	0	1	0	1	0	39	2970	1
0	2	2	0	0	1	0	1	0	1	0	39	3170	1
0	2	2	0	0	1	0	1	0	0	0	39	3430	1
0	2	2	0	1	1	0	1	0	1	0	39	4090	1
0	2	2	0	1	1	0	1	0	1	0	39	3700	1
0	2	2	0	1	1	0	1	0	1	0	39	3690	1
0	2	2	0	0	1	0	1	0	1	0	39	3770	1
0	2	2	0	0	1	0	1	0	0	0	39	3150	1
1	2	2	0	1	1	0	1	0	1	0	39	3400	1
0	2	2	0	0	2	0	1	0	1	0	39	3075	1
0	2	2	0	0	1	0	1	0	1	0	39	3470	1
0	2	2	1	1	2	0	1	0	1	0	39	4495	1
0	2	2	0	0	2	0	1	0	0	0	39	2980	1
1	2	2	0	1	2	0	1	0	0	0	39	3500	1
0	2	2	0	1	2	0	1	0	1	0	39	2985	1
1	2	2	0	1	1	0	1	0	1	0	39	3050	1
0	2	2	0	1	1	0	1	0	1	0	39	3560	1
1	2	2	0	1	1	1	1	0	1	0	39	3100	1
0	2	2	0	1	1	0	1	0	1	0	39	3490	1
0	2	2	0	1	1	0	1	0	0	0	39	3120	1
0	2	2	0	0	2	0	1	0	1	0	39	3405	1
0	2	2	0	1	1	0	1	0	0	0	39	3410	1
0	2	2	0	0	1	0	1	0	0	0	39	3220	1
0	2	2	0	1	1	0	1	0	1	0	39	3400	1
0	2	2	0	0	1	0	1	0	1	0	39	3180	1
0	2	2	0	1	1	0	1	0	1	0	39	3320	1
0	2	2	0	1	1	0	1	0	0	0	39	2950	1
0	2	2	0	1	1	0	1	0	0	0	39	2950	1
0	2	2	0	1	1	0	1	0	0	0	39	2950	1
0	2	2	0	1	1	0	1	0	0	0	39	3240	1
0	2	2	0	1	1	0	2	0	1	0	39	2590	1
0	2	2	0	1	1	0	1	0	1	0	39	3080	1
0	2	2	0	1	1	0	1	0	1	0	39	2930	1
1	2	2	0	1	2	0	1	1	0	0	39	3080	1
0	2	1	0	1	1	0	1	0	0	0	39	2390	1
0	2	2	0	1	1	0	1	0	1	0	39	3770	1
0	2	2	0	0	1	0	2	0	0	0	39	3080	1
1	2	2	1	0	1	0	1	1	0	0	39	4000	1
0	2	2	0	1	1	0	1	0	1	0	39	3330	1
1	2	2	1	0	1	1	1	1	0	0	39	2800	1
0	2	2	0	0	1	1	1	0	1	0	39	3340	1
0	2	2	0	0	1	1	1	0	0	0	39	3640	1
0	2	2	0	1	1	0	1	0	1	0	39	3900	1
0	2	2	0	1	1	0	1	0	0	0	39	3760	1
0	2	2	0	0	2	0	1	0	1	0	39	3500	1
0	2	2	0	1	1	0	1	0	1	0	39	3170	1
0	2	2	0	0	1	0	1	0	1	0	39	3050	1
0	2	2	0	0	1	0	1	0	1	0	39	3190	1
0	2	2	0	1	1	0	1	0	0	0	39	3470	1
0	2	2	0	0	1	0	1	0	1	0	39	3470	1
0	2	2	0	1	1	0	1	0	0	0	39	2880	1
0	2	2	0	1	2	0	1	0	1	0	39	3260	1
0	2	2	0	1	1	0	1	0	1	0	39	3110	1
0	2	1	1	1	1	0	1	0	0	0	39	2430	1
0	2	2	0	0	1	0	1	0	0	0	39	3420	1
0	2	2	0	1	1	0	1	0	1	0	39	3410	1
0	2	2	0	1	1	0	1	0	1	0	39	3540	1
0	2	2	0	0	2	0	1	0	0	0	39	3180	1
0	2	2	0	0	1	0	2	0	0	0	39	3100	1
0	2	2	0	1	1	0	2	0	0	0	39	3410	1
0	2	2	1	1	1	0	1	0	1	0	39	3550	1
0	2	2	0	1	1	1	2	0	1	0	39	2930	1
0	2	2	0	1	1	1	2	0	0	0	39	2930	1
0	2	2	0	1	1	0	1	0	0	0	39	3200	1
0	2	2	0	1	1	0	1	0	0	0	39	4160	1
0	2	2	0	1	1	0	2	0	1	0	39	3240	1
0	2	2	0	1	1	0	1	0	1	0	39	4130	1
0	2	2	0	1	1	0	1	0	1	0	39	3390	1
0	2	2	0	0	1	0	2	0	1	0	39	2920	1
0	2	2	0	1	1	0	1	0	1	0	39	3410	1
0	2	2	0	1	2	0	1	0	0	0	39	3605	1
0	2	2	0	1	1	0	1	0	1	0	39	4140	1
0	2	2	1	1	2	0	1	0	0	0	39	3200	1
0	2	2	0	1	1	0	1	0	0	0	39	3200	1
0	2	2	0	1	1	0	1	0	1	0	39	3640	1
0	2	2	0	1	1	0	1	0	0	0	39	3370	1
0	2	2	0	1	1	0	1	0	1	0	39	3510	1
0	2	2	0	0	1	0	1	0	0	0	39	3300	1
0	2	2	0	1	1	0	1	0	1	0	39	3280	1
0	2	2	0	0	2	0	1	0	0	0	39	3220	1
0	2	2	0	1	2	0	1	0	1	0	39	3450	1
0	2	2	1	1	2	0	1	0	1	0	39	3520	1
0	2	2	0	1	2	0	1	0	1	0	39	3420	1
0	2	2	0	1	2	0	1	0	1	0	39	3890	1
0	2	2	0	0	1	0	1	0	1	0	39	3940	1
0	2	2	0	1	1	0	2	0	1	0	39	3620	1
0	2	2	0	1	2	0	1	1	0	0	39	4470	1
0	2	2	0	1	1	0	2	0	1	0	39	2870	1
0	2	2	0	0	1	1	1	0	0	0	39	3190	1
0	2	2	0	0	1	1	1	0	1	0	39	3150	1
0	2	2	0	1	1	0	1	0	1	0	39	3100	1
0	2	2	0	1	2	0	1	0	1	0	39	3980	1
0	2	2	0	0	2	0	1	0	1	0	39	2990	1
0	2	2	0	0	2	0	1	0	0	0	39	2820	1
0	2	2	0	0	1	0	1	0	1	0	39	3430	1
0	2	2	1	1	2	0	1	0	0	0	39	3730	1
0	2	2	0	0	1	0	1	0	0	0	39	3830	1
1	2	2	0	1	2	0	1	1	0	0	39	3200	1
0	2	2	0	0	1	0	1	1	0	0	39	3220	1
0	2	2	0	1	1	0	1	0	1	0	39	2870	1
0	2	2	0	1	2	0	1	0	0	0	39	4105	1
0	2	2	1	0	2	0	1	0	1	0	39	3005	1
0	2	2	0	0	2	0	1	0	1	0	39	3340	1
0	2	2	0	1	1	0	2	0	1	0	39	3250	1
0	2	2	0	1	1	0	1	0	1	0	39	3120	1
0	2	2	0	0	2	0	1	0	0	0	39	3035	1
0	2	2	0	1	1	0	1	0	0	0	39	3160	1
0	2	2	0	1	1	0	1	0	0	0	39	2780	1
0	2	2	0	1	2	0	1	0	0	0	39	3980	1
0	2	2	0	0	1	0	2	0	0	0	39	3050	1
0	2	2	0	0	1	0	1	0	0	0	39	3420	1
0	2	2	0	0	1	0	1	0	1	0	39	3060	1
0	2	2	0	0	2	0	1	0	1	0	39	3220	1
0	2	2	0	1	1	0	1	0	1	0	39	3390	1
0	2	2	0	1	1	0	1	0	1	0	39	2560	1
0	2	2	0	0	1	0	1	0	1	0	39	3450	1
0	2	2	0	0	1	0	1	0	1	0	39	3240	1
0	2	2	0	0	1	0	1	0	1	0	39	3540	1
0	2	2	1	1	2	0	1	0	1	0	39	3890	1
0	2	2	0	1	2	0	1	0	0	0	39	3480	1
0	2	2	0	0	1	0	1	1	0	0	39	3350	1
0	2	2	0	0	1	1	1	0	0	0	39	3310	1
0	2	2	0	0	1	1	1	0	0	0	38	3700	1
0	2	2	0	0	1	1	1	0	1	0	38	3370	1
0	2	2	0	0	1	1	1	0	1	0	38	3380	1
1	2	2	0	1	1	1	1	1	0	0	38	3310	1
0	2	2	0	1	1	0	2	0	0	0	38	3240	1
0	2	2	0	0	2	0	1	0	1	0	38	3165	1
0	2	2	0	0	1	0	1	0	1	0	38	3820	1
0	2	2	0	0	1	0	1	0	1	0	38	3550	1
0	2	2	0	1	1	0	1	0	0	0	38	2800	1
0	2	2	0	1	2	0	1	0	1	0	38	3670	1
0	2	2	0	1	1	0	1	1	0	0	38	3100	1
0	2	2	0	1	1	1	2	0	0	0	38	3000	1
0	2	2	0	0	1	1	1	0	1	0	38	2570	1
0	2	2	0	1	1	0	1	0	1	0	38	3730	1
0	2	2	0	1	1	0	2	0	0	0	38	2920	1
0	2	2	0	1	2	0	1	0	1	0	38	2655	1
0	2	2	1	0	1	0	1	0	1	0	38	3560	1
0	2	2	0	1	1	0	1	0	1	0	38	3130	1
0	2	2	0	1	1	0	1	0	1	0	38	3790	1
0	2	2	1	1	2	0	1	0	0	0	38	2540	1
0	2	2	0	0	2	0	1	0	1	0	38	3200	1
0	2	2	0	0	2	0	1	0	0	0	38	3300	1
0	2	2	0	0	1	0	1	0	1	0	38	3390	1
0	2	2	0	0	2	0	1	0	1	0	38	3330	1
0	2	2	0	1	1	0	1	0	1	0	38	3420	1
0	2	2	0	1	1	0	1	0	1	0	38	3020	1
0	2	2	0	0	1	0	2	0	0	0	38	3290	1
0	2	2	0	1	1	0	1	0	1	0	38	3090	1
0	2	2	1	0	1	0	1	0	0	0	38	3790	1
0	2	2	0	1	1	0	2	0	1	0	38	3260	1
1	2	2	0	1	1	0	1	0	0	0	38	3100	1
0	2	2	0	1	1	0	1	0	0	0	38	3530	1
0	2	2	0	0	1	0	1	0	1	0	38	2670	1
1	2	2	0	1	2	0	1	0	1	0	38	2670	1
0	2	2	0	0	1	0	1	0	1	0	38	3560	1
0	2	1	0	0	1	1	1	0	1	0	38	2430	1
0	2	2	1	1	2	0	1	0	1	0	38	3250	1
0	2	2	0	1	2	0	1	0	1	0	38	3670	1
0	2	2	0	0	1	0	2	0	1	0	38	2980	1
0	2	2	0	0	1	0	1	0	1	0	38	2880	1
1	2	2	1	0	2	0	2	1	0	0	38	2910	1
0	2	2	0	1	2	0	1	0	1	0	38	3490	1
0	2	2	1	1	2	0	1	0	0	0	38	4180	1
0	2	2	1	1	2	0	1	0	0	0	38	3320	1
0	2	2	0	0	2	0	1	0	0	0	38	3275	1
0	2	2	0	0	1	0	2	0	0	0	38	3300	1
0	2	2	0	1	1	0	1	0	0	0	38	3240	1
0	2	2	1	1	1	0	1	0	1	0	38	3230	1
0	2	2	0	1	1	0	1	0	0	0	38	3570	1
0	2	2	0	1	1	0	1	0	1	0	38	3420	1
0	2	2	0	1	1	0	1	0	0	0	38	3740	1
0	2	2	0	1	2	0	1	0	1	0	38	3130	1
0	2	2	0	0	1	0	1	0	1	0	38	3110	1
0	2	2	0	1	1	0	1	0	1	0	38	3380	1
0	2	2	0	0	2	0	1	0	0	0	38	3820	1
0	2	2	0	0	2	0	1	0	0	0	38	3295	1
0	2	2	0	1	1	0	1	0	1	0	38	3280	1
0	2	2	0	0	1	1	1	0	0	0	38	3370	1
0	2	2	0	0	2	0	1	0	1	0	38	2630	1
1	2	2	1	1	1	0	1	0	0	0	38	2760	1
0	2	2	1	1	2	0	1	0	1	0	38	3575	1
0	2	2	0	1	1	0	2	0	1	0	38	2880	1
0	2	2	0	1	1	0	1	0	0	0	38	2660	1
0	2	2	0	1	1	0	1	0	1	0	38	4010	1
0	2	2	0	0	2	0	1	0	1	0	38	3150	1
0	2	2	0	1	2	0	1	0	1	0	38	4300	1
0	2	2	0	1	2	0	1	0	1	0	38	4300	1
0	2	2	0	1	1	0	1	0	1	0	38	3210	1
0	2	2	0	0	1	0	1	0	0	0	38	3620	1
0	2	2	0	1	2	0	1	0	1	0	38	3840	1
0	2	2	0	1	1	1	1	1	0	0	38	2800	1
0	2	2	0	0	1	1	1	0	0	0	38	3080	1
0	1	2	0	1	1	1	1	0	0	0	37	2930	1
0	1	2	0	0	1	1	1	0	1	0	37	3280	1
0	1	2	0	0	1	1	1	0	1	0	37	2900	1
0	1	2	0	1	1	0	1	0	1	0	37	3390	1
0	1	2	1	0	2	0	1	0	1	0	37	3595	1
0	1	2	0	0	1	0	1	0	0	0	37	3100	1
0	1	2	0	0	1	0	1	0	0	0	37	3230	1
0	1	2	0	1	1	0	1	0	0	1	37	3060	1
0	1	2	1	1	1	0	1	0	1	0	37	3780	1
0	1	2	0	1	1	0	1	0	0	0	37	3720	1
0	1	2	0	1	2	0	1	0	0	0	37	3350	1
0	1	2	1	1	2	0	1	0	1	0	37	3340	1
0	1	2	0	0	1	0	1	0	1	0	37	3370	1
0	1	2	0	1	1	0	1	0	0	0	37	2750	1
0	1	2	0	0	1	0	1	0	1	0	37	3160	1
0	1	2	0	0	1	0	2	0	1	0	37	3700	1
0	1	2	1	1	2	0	1	0	1	0	37	2940	1
0	1	2	0	1	2	0	1	0	1	0	37	3670	1
0	1	2	0	1	2	0	1	0	1	0	37	3250	1
0	1	2	0	0	1	0	1	0	0	0	37	2720	1
0	1	2	0	1	1	0	1	0	1	0	37	3040	1
0	1	2	0	1	2	0	1	0	0	0	37	3260	1
0	1	2	0	0	1	0	1	0	1	0	37	3580	1
0	1	2	0	0	2	0	1	0	0	0	37	2750	1
0	1	2	0	0	1	1	1	0	1	0	37	2800	1
0	1	2	0	0	1	0	1	0	1	0	37	2770	1
0	1	2	0	1	2	0	1	0	1	0	37	3720	1
0	1	1	0	0	2	0	1	0	1	0	37	2470	1
0	1	2	1	1	1	0	1	0	0	0	37	3400	1
0	1	2	1	1	2	0	1	0	0	0	37	4455	1
0	1	2	0	1	1	0	1	0	0	0	37	3320	1
0	1	2	1	0	1	0	2	0	0	0	37	2680	1
0	1	2	0	1	1	0	2	0	1	0	37	3560	1
0	1	2	1	1	2	0	1	0	0	0	37	3350	1
0	1	1	1	1	1	0	1	0	1	0	37	2460	1
0	1	1	0	1	1	0	1	0	1	0	37	2390	1
1	1	2	1	1	1	0	1	0	0	0	37	2770	1
0	1	2	1	1	2	0	1	0	0	0	37	4435	1
1	1	2	0	0	1	0	1	0	1	0	37	3000	1
0	1	2	0	0	1	0	1	1	0	0	37	3060	1
0	1	2	0	1	1	0	2	0	0	0	36	3500	1
1	1	1	0	0	1	0	1	0	0	0	36	2350	1
0	1	1	1	0	1	0	1	0	1	0	36	2350	1
0	1	2	0	0	2	0	1	0	0	0	36	2965	1
1	1	1	0	0	2	0	1	0	1	0	36	2420	1
0	1	2	0	1	2	0	1	0	0	0	36	3040	1
0	1	1	1	1	1	0	1	0	0	0	36	2350	1
0	1	1	0	0	1	0	1	0	1	1	36	2380	1
1	1	1	0	1	1	1	1	0	0	0	36	2200	1
1	1	2	1	0	2	0	1	0	0	0	36	2605	1
1	1	2	0	1	2	0	1	0	0	0	36	4025	1
1	1	2	0	1	1	1	1	0	0	0	36	2670	1
0	1	2	0	0	1	0	1	1	1	0	35	3050	1
0	1	2	0	0	1	0	1	0	0	0	35	2870	1
0	1	1	0	0	2	0	1	0	0	0	35	2050	1
0	1	1	1	1	2	0	1	0	1	0	35	2150	1
1	1	2	0	1	1	0	1	0	0	0	35	2520	1
1	1	2	0	1	2	1	1	0	0	0	35	4010	1
1	1	1	0	0	1	1	1	0	0	0	35	2150	1
1	2	2	0	0	2	1	1	0	0	0	40	3600	0
1	2	2	0	0	1	0	1	0	0	0	40	4100	0
1	2	2	0	1	1	0	2	0	0	0	40	3510	0
1	2	2	0	1	1	0	1	0	0	0	39	3250	0
1	2	2	0	0	1	0	1	0	1	0	39	2970	0
1	2	2	0	0	1	1	1	1	1	0	39	3680	0
1	2	2	0	1	2	0	1	0	0	0	39	3450	0
1	2	2	0	1	2	1	1	0	0	0	39	3420	0
1	2	2	0	0	1	1	1	0	0	0	39	3450	0
1	2	2	0	0	1	0	1	0	1	0	39	3480	0
1	2	2	0	0	2	0	1	1	0	0	39	3015	0
1	2	2	0	0	2	0	1	0	0	0	39	3550	0
1	2	2	0	1	1	0	1	0	0	0	38	3100	0
1	2	2	0	0	2	1	1	0	0	0	38	3730	0
1	2	2	0	0	1	0	1	0	0	0	38	3520	0
1	2	2	1	0	1	0	1	1	0	0	38	2910	0
1	2	2	0	1	2	1	1	0	0	0	38	3650	0
1	1	2	0	0	1	1	1	0	0	0	37	2970	0
1	1	2	0	1	2	0	1	1	0	0	37	3520	0
1	1	2	0	0	1	1	1	0	0	1	37	3660	0
1	1	1	0	1	2	0	1	0	0	0	37	2390	0
1	1	2	0	0	1	0	1	0	0	0	37	2900	0
1	1	1	0	0	2	0	1	0	0	0	37	2370	0
1	1	2	0	0	1	0	1	0	1	0	36	2550	0
1	1	1	0	0	2	0	1	0	0	0	36	2180	0
1	1	2	0	1	1	0	1	1	0	0	36	2540	0
1	1	1	1	0	2	0	1	0	1	0	36	2200	0
1	1	2	0	1	1	0	2	0	0	0	36	2660	0
1	1	1	0	1	2	1	1	0	0	0	35	2130	0
1	1	2	0	0	2	0	1	0	0	0	35	2500	0
1	1	1	0	0	2	0	1	0	0	0	35	2455	0
1	1	1	0	0	2	0	1	0	0	0	35	2450	0
1	1	1	1	1	2	0	1	0	0	0	35	2260	0
0	2	2	0	0	1	0	1	0	0	0	43	3200	0
0	2	2	0	0	1	0	2	1	1	0	41	4150	0
0	2	2	0	1	1	0	1	0	1	0	41	3800	0
0	2	2	0	1	1	1	1	0	0	0	41	3140	0
0	2	2	0	0	1	0	2	0	1	0	40	2920	0
0	2	2	0	0	1	0	1	0	0	0	40	3680	0
0	2	2	0	1	2	0	1	1	0	0	40	3500	0
0	2	2	0	0	1	0	1	1	1	0	40	3870	0
1	2	2	0	0	1	1	1	0	1	0	40	3600	0
0	2	2	0	0	1	0	1	0	1	0	40	3400	0
0	2	2	0	0	1	0	2	0	1	0	40	3560	0
0	2	2	0	0	1	0	1	0	0	0	40	3360	0
0	2	2	0	1	2	0	1	0	1	0	40	3750	0
0	2	2	0	1	1	0	1	0	1	0	40	3640	0
0	2	2	0	1	1	0	1	0	0	0	40	3400	0
0	2	2	0	0	1	0	2	0	0	0	40	3770	0
0	2	2	0	1	1	0	1	0	0	0	40	3300	0
0	2	2	0	0	1	0	2	0	0	0	40	3760	0
0	2	2	0	1	1	0	1	1	0	0	40	3400	0
0	2	2	0	1	1	0	2	0	1	0	40	4070	0
0	2	2	0	1	1	0	1	0	1	0	40	3350	0
0	2	2	0	1	1	0	1	0	1	0	40	3480	0
0	2	2	0	0	1	1	2	0	0	0	40	3510	0
0	2	2	0	1	1	0	1	0	1	0	40	3220	0
0	2	2	0	1	2	0	1	0	0	0	40	3350	0
0	2	2	0	1	2	0	2	1	1	0	40	3420	0
0	2	2	0	1	2	0	1	0	1	0	40	3350	0
0	2	2	0	1	2	0	1	1	0	0	40	3405	0
0	2	2	0	1	1	0	1	0	0	0	40	3530	0
0	2	2	0	1	1	0	1	0	1	0	40	3260	0
0	2	2	0	0	2	0	1	0	1	0	40	3350	0
0	2	2	0	1	1	0	1	0	0	0	40	3920	0
0	2	2	0	1	1	0	1	0	1	0	40	3280	0
0	2	2	0	0	1	0	1	0	1	0	40	3390	0
0	2	2	0	1	1	1	1	0	0	0	40	3400	0
0	2	2	0	1	1	1	1	0	1	0	40	3180	0
0	2	2	0	0	1	0	2	0	1	0	39	3590	0
0	2	2	0	0	1	0	1	0	1	0	39	3600	0
0	2	2	0	1	1	0	1	0	1	0	39	3820	0
0	2	2	0	1	1	0	1	0	1	0	39	2720	0
0	2	2	0	1	2	0	1	0	1	0	39	3490	0
0	2	2	0	1	1	0	1	0	1	0	39	3500	0
0	2	2	0	1	1	0	1	0	1	0	39	3260	0
0	2	2	0	0	1	0	2	0	0	0	39	3300	0
0	2	2	0	0	2	0	1	0	1	0	39	3215	0
0	2	2	0	0	1	0	2	0	1	0	39	3470	0
0	2	2	0	0	1	0	2	0	1	0	39	2850	0
0	2	2	0	1	1	0	1	0	1	0	39	3740	0
0	2	2	0	1	1	0	1	0	1	0	39	3890	0
0	2	2	0	0	1	0	1	0	1	0	39	3410	0
0	2	2	0	0	1	0	2	0	1	0	39	3330	0
0	2	2	0	0	1	1	1	0	0	0	39	3210	0
0	2	2	0	1	1	0	1	0	0	0	39	3350	0
0	2	2	0	0	1	0	2	0	1	0	39	3030	0
1	2	2	0	1	2	0	2	1	0	0	39	3180	0
0	2	2	0	1	1	0	1	0	1	0	39	3000	0
0	2	2	0	0	1	0	2	0	1	0	39	3600	0
0	2	2	0	0	1	0	1	0	1	0	39	3150	0
0	2	2	0	1	1	0	1	0	1	0	39	3700	0
0	2	2	0	1	1	0	1	0	0	0	39	3400	0
0	2	2	0	1	1	0	1	0	1	0	39	3510	0
0	2	2	0	0	1	0	2	0	1	0	39	2890	0
0	2	2	1	0	2	0	1	0	0	0	39	3970	0
0	2	2	0	1	1	0	1	0	1	0	39	3710	0
0	2	2	0	1	2	0	1	0	1	0	39	2830	0
0	2	2	0	1	1	0	1	0	1	0	39	3430	0
0	2	2	0	0	1	1	1	0	0	0	39	3000	0
0	2	2	0	0	1	0	1	0	1	0	39	3420	0
0	2	2	0	1	1	0	2	0	1	0	39	3240	0
0	2	2	0	1	1	0	1	0	1	0	39	3720	0
0	2	2	0	1	1	0	1	0	1	0	39	3850	0
0	2	2	0	1	2	0	1	0	1	0	39	3220	0
0	2	2	0	0	1	0	1	0	0	0	39	3250	0
0	2	2	0	1	1	0	1	0	0	0	39	3080	0
0	2	2	0	1	1	0	1	0	0	0	39	3490	0
0	2	2	0	1	2	0	1	0	0	0	39	3800	0
0	2	2	0	1	1	0	1	0	1	0	39	3520	0
0	2	2	0	0	2	1	1	0	1	0	39	3630	0
0	2	2	0	1	1	0	1	0	0	0	39	3220	0
0	2	2	0	1	1	0	1	0	1	0	39	3350	0
0	2	2	0	1	1	0	1	0	1	0	39	4110	0
0	2	2	0	1	1	0	1	0	1	0	39	3060	0
0	2	2	0	1	1	0	2	0	0	0	39	3180	0
0	2	2	0	1	2	0	1	0	0	0	39	3110	0
0	2	2	0	0	1	0	1	0	0	0	39	3090	0
0	2	2	0	0	1	0	1	0	1	0	39	3590	0
0	2	2	0	0	2	0	1	0	1	0	39	3605	0
0	2	2	0	0	2	0	1	0	1	0	39	3035	0
1	2	2	0	0	1	1	1	0	1	0	39	3220	0
1	2	2	0	1	1	0	2	1	0	0	39	3580	0
1	2	2	0	1	1	0	2	0	0	0	39	4050	0
0	2	2	0	0	1	0	1	0	1	0	39	3680	0
0	2	2	0	0	1	1	1	0	1	0	38	3370	0
0	2	2	0	0	2	0	1	0	1	0	38	2975	0
0	2	2	0	1	1	0	1	0	1	0	38	2950	0
0	2	2	0	1	2	0	1	0	0	0	38	3450	0
0	2	2	0	1	1	0	1	0	1	0	38	4350	0
1	2	2	0	1	2	0	1	1	0	0	38	3560	0
0	2	2	0	0	1	0	1	0	1	0	38	2860	0
0	2	2	0	1	1	0	1	0	0	0	38	3320	0
0	2	2	0	1	1	0	1	0	1	0	38	3000	0
0	2	2	0	0	1	0	1	0	0	0	38	4500	0
0	2	2	0	0	1	0	2	0	1	0	38	3730	0
0	2	2	0	1	2	0	1	0	0	0	38	3545	0
0	2	2	0	1	2	0	1	0	0	0	38	3850	0
0	2	2	0	1	1	0	1	0	1	0	38	3020	0
0	2	2	0	0	1	0	1	0	0	0	38	3350	0
0	2	2	0	0	1	0	1	0	1	0	38	3470	0
0	2	2	0	0	1	1	1	0	1	0	38	3320	0
0	2	1	0	1	1	0	1	0	1	0	38	2310	0
0	2	2	0	0	1	0	1	0	1	0	38	3170	0
0	2	2	0	1	1	0	1	0	0	0	38	3540	0
0	2	2	0	1	1	0	1	0	0	0	38	2820	0
0	2	2	0	1	1	0	1	0	0	0	38	3000	0
0	2	2	0	1	1	0	1	0	1	0	38	3650	0
0	2	2	0	0	1	0	2	0	0	0	38	2900	0
0	2	2	1	0	1	0	2	0	1	0	38	3610	0
0	2	2	0	0	1	1	1	0	1	0	38	2570	0
0	2	2	0	1	1	0	2	0	1	0	38	3270	0
0	2	2	0	1	1	0	1	0	1	0	38	3200	0
0	2	2	0	0	1	0	1	0	1	0	38	3700	0
0	2	2	0	1	2	0	1	0	0	0	38	3350	0
0	2	2	0	0	1	1	1	0	1	0	38	3400	0
0	2	2	0	1	1	0	1	0	0	0	38	2990	0
0	2	2	0	1	1	0	1	0	1	0	38	3240	0
0	2	2	0	0	1	1	1	0	0	0	38	2970	0
0	2	2	0	0	1	0	1	0	1	0	38	2770	0
0	2	2	0	0	1	0	1	0	1	0	38	3280	0
0	2	2	0	1	2	0	1	0	0	0	38	3885	0
1	2	2	0	0	2	1	1	0	0	0	38	3330	0
0	2	2	0	1	1	0	1	0	0	0	38	3560	0
0	2	2	0	0	1	0	1	0	0	0	38	3520	0
0	1	2	0	1	1	0	1	0	0	0	37	3150	0
0	1	2	0	0	1	0	1	0	1	0	37	2690	0
1	1	2	0	1	1	0	1	0	1	0	37	3450	0
0	1	2	0	1	2	0	1	0	1	0	37	3350	0
0	1	2	1	0	2	0	1	0	1	0	37	3145	0
0	1	1	1	0	1	0	1	0	0	0	37	2450	0
0	1	2	0	0	1	0	1	0	0	0	37	2850	0
0	1	1	1	0	2	0	1	0	1	0	37	2480	0
0	1	2	0	0	1	0	1	0	1	0	37	2950	0
0	1	2	0	1	2	0	1	0	1	0	37	2730	0
0	1	2	0	1	1	0	1	0	1	0	37	3870	0
0	1	2	0	0	1	0	1	0	0	0	37	3710	0
0	1	2	0	1	2	0	1	0	1	0	37	3000	0
1	1	2	1	0	2	0	1	1	0	0	37	2595	0
0	1	2	1	1	1	0	1	0	1	0	37	3780	0
0	1	2	1	1	1	0	1	0	1	0	37	3060	0
0	1	1	0	1	2	0	1	0	1	0	37	2490	0
0	1	2	0	0	1	1	1	1	1	0	37	3060	0
0	1	2	1	1	1	0	1	0	1	0	36	3050	0
0	1	1	1	0	2	0	1	0	0	0	36	2490	0
0	1	2	0	0	2	0	1	0	1	0	36	3055	0
0	1	2	1	0	1	0	1	0	0	0	36	2500	0
0	1	1	1	0	2	0	1	0	0	0	36	2230	0
1	1	2	1	1	2	0	1	0	1	0	36	3720	0
1	1	1	0	0	1	0	1	0	0	1	35	2250	0
1	1	1	1	0	2	0	1	0	0	0	35	2080	0
1	1	2	1	1	1	0	1	0	1	0	35	4305	0
Remarks:
END: 1 = hyperbilirubinaemia; 2 = non-hyperbilirubinaemia
GA (V2): 1=<38w; 2=≥38w
BW (V3): 1=<2500g; 2=≥2500g
Hypertension in pregnancy（V5）：1=Yes；0=No
Gestational diabetes (V6): 1=Yes; 0=No
Hypothyroidism in pregnancy（V7）：1=Yes；0=No
PROM≥18h OR maternal fever Maternal-infant blood type（V8）：1=Yes；0=No
Amniotic fluid situation (V12): 1 = clear; 2 = contaminated
Maternal-infant blood type Incompatibility AND Coomb’s test(+)（V17）：1=Yes；0=No
Probiotic supplementation（V20）：1=Yes；0=No
Weight loss >9% in 3 days（V21）：1=Yes；0=No
test: 1 = training set; 0 = validation set
